1 **Direct RNA sequencing reveals m<sup>6</sup>A modifications on adenovirus RNA are necessary for**  
2 **efficient splicing**

3  
4 Alexander M. Price<sup>1</sup>, Katharina E. Hayer<sup>2</sup>, Alexa B.R. McIntyre<sup>3,4,a</sup>, Nandan S. Gokhale<sup>5,b</sup>,  
5 Ashley N. Della Fera<sup>1,c</sup>, Christopher E. Mason<sup>3,7,8,9</sup>, Stacy M. Horner<sup>5,6</sup>, Angus C. Wilson<sup>10</sup>,  
6 Daniel P. Depledge<sup>11,\*</sup>, and Matthew D. Weitzman<sup>1,12,\*</sup>

7  
8 <sup>1</sup>Division of Protective Immunity and Department of Pathology and Laboratory Medicine, The  
9 Children's Hospital of Philadelphia, Philadelphia, PA

10 <sup>2</sup>Department of Biomedical and Health Informatics, The Children's Hospital of Philadelphia,  
11 Philadelphia, PA

12 <sup>3</sup>Department of Physiology and Biophysics, Weill Cornell Medicine, New York, NY

13 <sup>4</sup>Tri-Institutional Program in Computational Biology and Medicine, New York, NY

14 <sup>5</sup>Department of Molecular Genetics and Microbiology, Duke University Medical Center, Durham,  
15 NC

16 <sup>6</sup>Department of Medicine, Duke University Medical Center, Durham, NC

17 <sup>7</sup>The HRH Prince Alwaleed Bin Talal Abdulaziz Alsaud Institute for Computational Biomedicine,  
18 Weill Cornell Medicine, New York, NY

19 <sup>8</sup>The World Quant Initiative for Quantitative Prediction, Weill Cornell Medicine, New York, NY

20 <sup>9</sup>The Feil Family Brain and Mind Research Institute, Weill Cornell Medicine, New York, NY

21 <sup>10</sup>Department of Microbiology, New York University School of Medicine, New York, NY

22 <sup>11</sup>Department of Medicine, New York University School of Medicine, New York, NY

23 <sup>12</sup>Department of Pathology and Laboratory Medicine, University of Pennsylvania Perelman  
24 School of Medicine, Philadelphia, PA

25  
26 Current address: <sup>a</sup>Department of Molecular Life Sciences, University of Zurich; <sup>b</sup>Department of  
27 Immunology, University of Washington, Seattle, WA; <sup>c</sup>Biological Sciences Graduate Group,  
28 University of Maryland, College Park, MD

29  
30 \*Co-corresponding authors

31  
32 Contact Information:  
33 daniel.depledge@nyulangone.org; weitzmanm@email.chop.edu

34

35 **Abstract**

36 Adenovirus is a nuclear replicating DNA virus reliant on host RNA processing machinery.  
37 Processing and metabolism of cellular RNAs can be regulated by METTL3, which catalyzes the  
38 addition of *N*6-methyladenosine (m<sup>6</sup>A) to mRNAs. While m<sup>6</sup>A-modified adenoviral RNAs have  
39 been previously detected, the location and function of this mark within the infectious cycle is  
40 unknown. Since the complex adenovirus transcriptome includes overlapping spliced units that  
41 would impede accurate m<sup>6</sup>A mapping using short-read sequencing, we profiled m<sup>6</sup>A within the  
42 adenovirus transcriptome using a combination of meRIP-seq and direct RNA long-read  
43 sequencing to yield both nucleotide and transcript-resolved m<sup>6</sup>A detection. Although both early  
44 and late viral transcripts contain m<sup>6</sup>A, depletion of m<sup>6</sup>A writer METTL3 specifically impacts viral  
45 late transcripts by reducing their splicing efficiency. These data showcase a new technique for  
46 m<sup>6</sup>A discovery within individual transcripts at nucleotide resolution, and highlight the role of m<sup>6</sup>A  
47 in regulating splicing of a viral pathogen.

## 48 Introduction

49 Adenovirus is a nuclear-replicating DNA virus with a linear double-stranded genome that  
50 is dependent on the host cell machinery for productive infection<sup>1</sup>. To maximize coding capacity  
51 of the 36 kilobase genome, adenovirus employs a tightly regulated gene transcription process.  
52 Early genes and subsequent late genes are produced from both strands of DNA using cellular  
53 RNA polymerase II and the spliceosomal machinery to generate capped, spliced, and  
54 polyadenylated messenger RNAs (mRNA). Besides the four canonical ribose nucleosides,  
55 adenoviral RNA is also known to contain RNA modifications<sup>2,3</sup>. RNA modifications comprise a  
56 family of over one hundred chemical modifications of nucleic acid that can play important roles  
57 in both RNA biogenesis and function<sup>4,5</sup>. In eukaryotic messenger RNA, N<sup>6</sup>-methyladenosine  
58 (m<sup>6</sup>A) is the most prevalent RNA modification besides the 7-methylguanosine cap<sup>6</sup>. This mark  
59 has been implicated in regulating multiple processes of RNA maturation, including splicing,  
60 polyadenylation, export, translation, and ultimately decay<sup>7-12</sup>. Current understanding suggests  
61 that m<sup>6</sup>A is added to messenger RNAs co-transcriptionally in the nucleus by recruitment of a  
62 writer complex composed of METTL3, METTL14, WTAP, and other accessory proteins to RNA  
63 polymerase II<sup>13-15</sup>. These modified mRNAs are bound by reader proteins such as the YTH  
64 family (YTHDC1-2, YTHDF1-3)<sup>16,17</sup>, various hnRNPs<sup>18,19</sup>, and the IGF2B<sup>20</sup> family of RNA binding  
65 proteins, which affect various downstream fates of the modified mRNAs. This mark is reversible  
66 through the action of erasers, and FTO and ALKBH5 have been proposed to demethylate  
67 m<sup>6</sup>A<sup>8,21,22</sup>.

68 Shortly after the discovery of m<sup>6</sup>A in cellular RNAs, RNAs from several diverse viruses  
69 such as adenovirus, Rous sarcoma virus, simian virus 40, herpes simplex virus, and influenza A  
70 virus were also shown to contain m<sup>6</sup>A in internal regions<sup>2,3,23-26</sup>. In particular, adenovirus  
71 serotype 2 was shown to contain m<sup>6</sup>A at sites away from the cap<sup>2</sup>. These marks were added to  
72 nuclear pre-mRNA and retained in the fully processed cytoplasmic RNA<sup>3</sup>. However, no  
73 subsequent studies have elucidated the functions of m<sup>6</sup>A modification in adenovirus. With the  
74 advent of high-throughput m<sup>6</sup>A sequencing methods, interest in viral RNA modifications has  
75 been rekindled. RNA viruses such as HIV, influenza A, picornavirus, and various *Flaviviridae*  
76 including Zika, dengue, and hepatitis C virus are influenced both positively and negatively by  
77 m<sup>6</sup>A added via METTL3, and many of these viral RNAs are bound by cytoplasmic YTHDF  
78 proteins<sup>27-34</sup>. In hepatitis B virus, m<sup>6</sup>A at the same site can both stimulate reverse transcription  
79 as well as reduce mRNA stability<sup>35</sup>. For DNA viruses such as SV40 and KSHV, deposition of  
80 m<sup>6</sup>A on viral RNA transcripts can enhance viral replication<sup>36-39</sup>. Interestingly, multiple labs have  
81 published conflicting functions for m<sup>6</sup>A within the same viral transcript of KSHV, which suggests

82 cell-type-specific roles<sup>39</sup>. Of note, recent work using human cytomegalovirus also implicates  
83 m<sup>6</sup>A in controlling aspects of the interferon response, thereby indirectly regulating viral  
84 infection<sup>40,41</sup>. Since adenovirus is reliant on cellular polymerases and mechanisms to generate  
85 and process its viral RNAs, adenovirus infection provides an excellent opportunity to study the  
86 consequences of co-transcriptional m<sup>6</sup>A addition.

87       Until recently, sequencing methods to map m<sup>6</sup>A have relied on antibody-based  
88 immunoprecipitations to enrich for methylated RNA within a relatively large nucleotide window  
89 (methylated RNA immunoprecipitation sequencing, meRIP-seq or m<sup>6</sup>A-seq)<sup>42,43</sup>. These  
90 techniques are indirect, because antibody-precipitated RNA has to be converted to cDNA before  
91 sequencing. Although other RNA modifications can be located due to mutations or truncations  
92 resulting from reverse transcription<sup>44–46</sup>, these events are not generated in the case of m<sup>6</sup>A due  
93 to efficient base pairing with thymine and uracil. Several techniques have circumvented some of  
94 these limitations, such as photo-crosslinking assisted m<sup>6</sup>A sequencing (PA-m<sup>6</sup>A-Seq)<sup>47</sup>, m<sup>6</sup>A  
95 individual nucleotide resolution crosslinking and immunoprecipitation (miCLIP)<sup>48,49</sup>, and RNA  
96 digestion via m<sup>6</sup>A sensitive RNase (MAZTER-seq)<sup>50</sup>. In general, these methods are labor  
97 intensive, and require either specialized chemical addition to cell culture, large amounts of input  
98 material, or higher unique read counts than meRIP-seq<sup>49</sup>. Furthermore, the antibodies used to  
99 precipitate m<sup>6</sup>A may themselves have sequence or structure biases, and cannot distinguish  
100 between m<sup>6</sup>A and the similar modifications m<sup>6</sup>A<sub>m</sub><sup>22,51</sup>. To this end, the ability to sequence native  
101 RNA molecules directly using nanopore arrays provides a new approach to locate RNA  
102 modifications. While detecting modified DNA nucleotides is possible using both PacBio and  
103 Oxford Nanopore Technologies platforms<sup>52,53</sup>, detection of RNA modifications has proven much  
104 more challenging. Recently, two groups have shown detection of m<sup>6</sup>A using nanopores in yeast  
105 total RNA and in human cell lines<sup>54,55</sup>. In addition to detecting RNA modifications directly,  
106 production of long reads by these platforms provides distinct advantages in the study of gene-  
107 dense viral genomes, which encode complex and often overlapping sets of transcripts<sup>56</sup>. To  
108 date, the ability to use direct RNA sequencing to map full-length transcripts and their RNA  
109 modifications unambiguously has not been realized.

110       In this study, we found that adenovirus infection does not alter expression of m<sup>6</sup>A-  
111 interacting enzymes but instead concentrates these host proteins at sites of nascent viral RNA  
112 synthesis. While meRIP-Seq was able to identify numerous methylated regions on both early  
113 and late kinetic classes of viral mRNA, the complex splicing structure and overlapping nature of  
114 the adenovirus transcriptome precluded unambiguous transcript assignments and m<sup>6</sup>A  
115 localization by this method alone. To overcome this limitation, we developed a method to predict

116 sites of m<sup>6</sup>A modification at single-base resolution within full-length RNA by direct RNA  
117 sequencing and used this technique to predict m<sup>6</sup>A specific to transcript isoforms. While we  
118 found that both viral early and late genes are marked by m<sup>6</sup>A, expression of viral late RNAs in  
119 particular decreased dramatically with loss of the cellular m<sup>6</sup>A writer METTL3. This late gene-  
120 biased effect was primarily mediated by decreased RNA splicing efficiency in the absence of  
121 METTL3, and could be extended to all of the multiply spliced adenovirus late RNAs. Overall,  
122 these results highlight a new technological advancement in long-read RNA sequencing, and  
123 reveal that m<sup>6</sup>A influences the splicing and expression from a viral pathogen.

124

## 125 **Results**

### 126 **Nuclear m<sup>6</sup>A-interacting factors concentrate at viral RNA during adenovirus infection**

127 While it is known that adenovirus RNA transcripts contain m<sup>6</sup>A, the impact of infection on  
128 cellular components involved in writing, reading, or erasing m<sup>6</sup>A is unknown. The majority of  
129 m<sup>6</sup>A on messenger RNA is installed co-transcriptionally in the nucleus, where adenovirus  
130 replicates, by a writer complex composed minimally of METTL3, METTL14, and WTAP<sup>13-15</sup>. To  
131 examine whether m<sup>6</sup>A-interacting enzymes are altered during adenovirus infection, we  
132 performed immunoblot analysis over a time-course of infection with adenovirus serotype 5 (Ad5)  
133 in A549 lung adenocarcinoma cells (**Figure 1a**). Over the course of infection, levels of the  
134 assayed writers (METTL3, METTL14, and WTAP) and readers (YTHDC1, YTHDF1, and  
135 YTHDF2) remain unchanged. There was a modest increase in levels of both purported erasers,  
136 FTO and ALKBH5, including the appearance of a faster migrating band detected with the  
137 ALKBH5 antibody.

138 Adenovirus is known to recruit specific cellular factors to viral replication centers or  
139 mislocalize antiviral cellular factors<sup>57</sup>. To determine if localization of m<sup>6</sup>A-interacting factors were  
140 similarly altered, we performed indirect immunofluorescence microscopy to localize cellular  
141 proteins, as well including an antibody against the viral DNA binding protein (DBP) to demarcate  
142 viral replication centers (**Figure 1b**). When comparing mock-infected A549 cells to cells infected  
143 with Ad5 for 18 hours, we observed that METTL3, METTL14, WTAP, and YTHDC1 relocalized  
144 from their diffuse nuclear pattern into ring-like structures surrounding the sites of viral DNA  
145 replication marked by DBP. These structures have been previously characterized as sites of  
146 viral RNA transcription<sup>58</sup>, and was consistent with staining for phospho-serine 2 on the RNA Pol  
147 II C-terminal domain, a marker of actively transcribing polymerase (**Figure 1c**). The localization  
148 of cytoplasmic readers (YTHDF1, YTHDF2) and demethylases (ALKBH5 and FTO) was mostly  
149 unchanged. These data highlight that while adenovirus does not significantly alter expression

150 levels of known m<sup>6</sup>A writing enzymes, these nuclear proteins are concentrated at sites of viral  
151 RNA synthesis during infection.

152

### 153 **Adenovirus transcripts contain METTL3-dependent m<sup>6</sup>A modifications**

154 While it is known that adenovirus RNAs contain m<sup>6</sup>A, it is not known exactly where these  
155 marks are located or whether adenovirus infection affects m<sup>6</sup>A localization within host  
156 transcripts<sup>2,3</sup>. To address these questions, we performed meRIP-seq on poly(A)-selected RNA  
157 from A549 cells that were mock-infected or infected with Ad5 for 24 hours. Strand-specific  
158 sequencing was performed on fragmented RNA immunoprecipitated (IP) with an anti-m<sup>6</sup>A  
159 antibody, as well as on total input RNA. We used the MACS2 algorithm to call peaks in IP over  
160 input reads for both viral and cellular transcriptomes across three biological replicates (**Figure**  
161 **2a**). HOMER motif analysis revealed the characteristic DRACH signature (Where D=A/G/U,  
162 R=A/G, and H=A/U/C) as the highest ranked motif in cellular m<sup>6</sup>A peaks in both mock and  
163 infected conditions, indicating that the immunoprecipitation was successful and that use of the  
164 canonical m<sup>6</sup>A motif was unperturbed by infection (**Figure 2b**). Furthermore, the general  
165 location of m<sup>6</sup>A peaks in cellular transcripts was unchanged during infection and showed the  
166 characteristic stop codon/3'UTR bias in mRNA metagene plots (**Figure 2c**). We next focused on  
167 m<sup>6</sup>A addition to viral transcripts and identified 19 peaks in the forward transcripts and 6 in the  
168 reverse transcripts (**Figure 2a**). While these peaks covered every viral kinetic class and  
169 transcriptional unit produced by the virus, the MACS2-generated peak areas were very broad,  
170 and it was impossible to identify which of many overlapping viral transcripts were m<sup>6</sup>A  
171 methylated.

172 We next asked whether viral RNAs were m<sup>6</sup>A-methylated by cellular enzyme METTL3.  
173 To achieve this, METTL3 was knocked down by siRNA prior to Ad5 infection of A549 cells and  
174 meRIP followed by qRT-PCR of total RNA was performed at 24 hours post-infection (**Figure 2d,**  
175 **2e**). Our results demonstrate that the amount of m<sup>6</sup>A-marked RNA available for  
176 immunoprecipitation of both the early viral transcript DBP, late viral RNAs generated from the  
177 Major Late Promoter (MLP), as well as the positive control cellular transcript *MALAT1*, were all  
178 reduced after knockdown of METTL3. These data indicate that viral early and late transcriptional  
179 units contain m<sup>6</sup>A, and that this modification is added by the cellular writer complex that includes  
180 METTL3. However, the exact location of the m<sup>6</sup>A mark could not be assessed by this approach.

181

### 182 **A statistical framework predicts sites of m<sup>6</sup>A methylation using direct RNA sequencing**

183 To address shortcomings of short read-based m<sup>6</sup>A-sequencing platforms, we sought a  
184 technique that would provide both single nucleotide resolution as well as long read length to  
185 allow for unambiguous assignment of m<sup>6</sup>A sites to specific adenovirus mature transcripts.  
186 Nanopore sequencing has been used to call DNA modifications directly using differences  
187 between measured and expected current values as nucleotides travel through the pore<sup>53</sup>. It is  
188 established that signal deviations during direct RNA sequencing can result from the presence of  
189 one or more base modifications, and that this leads to an increase in base-call error rate around  
190 the modified base<sup>54,59</sup>. The likelihood of a given nucleotide being modified (i.e. carrying an m<sup>6</sup>A  
191 mark) can be assessed by a 2x5 contingency table to examine the distribution of base-calls  
192 between two datasets (e.g. m<sup>6</sup>A positive and m<sup>6</sup>A negative) at a given genome position, as was  
193 recently suggested<sup>60</sup>. Here, a G-test on the distribution of A, C, G, U, and indels provides a  
194 score and p-value that requires subsequent (Bonferroni) correction for multiple testing (**Supp**  
195 **Figure 1a**). Expanded methodology and detailed statistical testing are described in the  
196 methods.

197 To produce m<sup>6</sup>A positive and negative datasets, we generated METTL3 knockout A549  
198 cells using CRISPR-Cas9 and a strategy that included regulated expression of a nuclease-  
199 insensitive transgene (**Figure 2f**). We performed direct RNA sequencing using two biological  
200 replicates each of RNA collected from parental wild-type A549 cells (WT) and METTL3  
201 knockout A549 cells (M3KO), each infected with Ad5 for 24 hours (**Figure 3a**). Since the  
202 datasets are unlinked, each METTL3 KO dataset was compared to each WT parental dataset,  
203 yielding four distinct comparisons (**Supp Figure 1b**). Each comparison yielded between 335-  
204 452 candidate sites with significant G-test statistics. To account for only the positions at which  
205 the base error rate was greater in the WT (m<sup>6</sup>A positive) dataset, we filtered for a one-fold or  
206 greater increase in the ratio of mismatch:match base-calls compared to the M3KO (m<sup>6</sup>A  
207 negative) dataset. This reduced the number of putative sites to 191-217 (**Supp Figure 1b**).  
208 Reasoning that multiple sites proximal to a single m<sup>6</sup>A modification could show significant  
209 differences (adjusted p<0.01 in error rate), we next calculated the distance between each  
210 candidate site and its nearest neighbor candidate in a strand-specific manner (**Supp Figure 1c**).  
211 We determined that the majority of candidate sites had at least one neighboring m<sup>6</sup>A candidate  
212 site within five nucleotides, so we implemented an additional filtering strategy to mask all but  
213 one candidate site within five nucleotides of a given AC motif (**Figure 3b**), retaining only a single  
214 candidate site with the highest G-test statistic. We subsequently plotted the distance (number of  
215 nucleotides) from the identified base to the nearest upstream or downstream AC motif (the  
216 minimal possible m<sup>6</sup>A motif). Most significant candidate sites filtered for mismatch:match rates

217 (94.2-99%) were located within five nucleotides of an AC motif (**Figure 3c**), the maximum  
218 distance at which a modified base is thought to affect basecall error<sup>59</sup>. Masking reduced this  
219 fraction slightly (92.7-98.9%, **Figure 3c**) and yielded 89-111 distinct predicted m<sup>6</sup>A sites, of  
220 which 53 were conserved across all four dataset comparisons (**Figure 3d**, highlighted by dark  
221 blue line in **Figure 2a**). The majority (83.1%) of these 53 sites mapped directly to adenines in  
222 AC motifs, with the remainder mapping within four nucleotides (**Figure 3c**). When random non-  
223 candidate nucleotides were selected from our dataset we found that the distance to the nearest  
224 AC motif was much greater than for m<sup>6</sup>A-candidate sites, indicating that this was not due to  
225 random chance (**Supp Figure 1d**). We subsequently extracted the ten base sequence centered  
226 on a candidate m<sup>6</sup>A site and generated a sequence logo (DRAC, **Figure 3e**) that closely  
227 matched the m<sup>6</sup>A DRACH logo that we confirmed for m<sup>6</sup>A modifications in the human genome.  
228 Concordance between the predicted m<sup>6</sup>A sites and the previously established motif supports the  
229 validity of this unbiased mapping approach.

230

### 231 **Exome versus isoform-level m<sup>6</sup>A analysis**

232 After identifying putative m<sup>6</sup>A-modified bases within the viral RNA exome using direct  
233 RNA-seq, we extended our approach to transcript isoform-level analysis. Here, we aligned our  
234 nanopore sequencing reads against 75 distinct transcripts derived from the recently re-  
235 annotated adenovirus Ad5 genome and observed that the aligner (MiniMap2<sup>61</sup>) produced  
236 secondary alignments for many reads and supplementary alignments for a smaller subset of  
237 reads (**Supp Figure 1e**). Secondary alignments indicate that a region of a given sequence read  
238 aligns with high confidence against two or more distinct transcripts while supplementary  
239 alignments indicate potentially chimeric reads where two segments of the same read align to  
240 separate overlapping transcripts (**Figure 4a**). Given the possibility that overlapping transcript  
241 isoforms may share the same NNACN motifs but still undergo differential methylation, we  
242 reasoned that reads with multiple alignments could reduce sensitivity of detection. We thus  
243 retained only reads that produced unique alignments with mapping qualities >0 and had no  
244 insertions greater than 20 nucleotides, with the latter requirement intended to exclude reads  
245 from incompletely spliced RNAs. While this approach discarded 63-69% of our sequence reads  
246 (**Supp Figure 1e**), the specificity achieved by unambiguous isoform-level assignment of  
247 sequence reads allowed us to identify 747 putative m<sup>6</sup>A-modified bases across 47 transcripts.  
248 This translated to 352 exome-level sites, of which 204 were conserved across all pairwise  
249 comparisons (**Figure 4b**, highlighted by magenta lines in **Figure 2a**). Isoform-level analysis  
250 recapitulated the majority of exome-level sites identified above (47/53), while identifying an



251 additional 50 m<sup>6</sup>A sites (**Figure 4c**). This represents a four-fold increase when compared to the  
252 equivalent exome-level analysis, demonstrating the greater sensitivity of the isoform-level  
253 approach. Furthermore, this strategy allowed us to detect transcripts that had unique m<sup>6</sup>A sites,  
254 even compared to overlapping transcripts that shared the same potential DRACH motifs (**Figure**  
255 **4d**). Overall, these data highlight a novel technique that reveals m<sup>6</sup>A marks at both single  
256 nucleotide and isoform-specific levels, greatly improving our ability to map m<sup>6</sup>A modifications  
257 across complex viral transcriptomes.

258

### 259 **Loss of METTL3 and m<sup>6</sup>A methylation differentially impacts late viral gene expression**

260 Since both viral early and late genes are marked by METTL3-dependent m<sup>6</sup>A, we asked  
261 what role this mark might play in the viral infectious cycle. As reported by others, siRNA-  
262 mediated knockdown of METTL3 results in a concomitant loss of METTL14, and vice versa<sup>14</sup>.  
263 Upon knockdown of either METTL3 or METTL14, we observed reductions of viral late proteins  
264 Hexon, Penton, and Fiber. In contrast, the viral early protein DBP was largely unaffected  
265 (**Figure 5a**), even though the DBP transcript is also marked by m<sup>6</sup>A (**Figure 2a**). When we  
266 assessed viral genome amplification by qPCR, we detected only a minimal change after  
267 knockdown of METTL3 or METTL14 (**Figure 5b**), indicating m<sup>6</sup>A is not required for early stage  
268 adenovirus infection. This contrasts with robust decreases in the number of infectious particles  
269 in lysates derived from infected cells knocked down for either METTL3 or METTL14, as  
270 measured by plaque assay (**Figure 5c**). Consistent with these findings, when we used reverse  
271 transcription coupled with quantitative PCR (qRT-PCR) to measure total viral mRNA levels over  
272 a time course of infection (**Figure 5d**), we observed that early viral genes were only modestly  
273 (less than two-fold or not significantly) decreased by METTL3 knockdown, whereas viral late  
274 genes were significantly reduced (sometimes greater than 10-fold). To corroborate these  
275 findings from siRNA-mediated knockdown, we also assayed specific stages of the viral  
276 infectious cycle in METTL3 KO A549 cells. Two independently generated CRISPR-mediated  
277 knockout cells were infected with Ad5 for 24 hours and assayed for viral early and late genes by  
278 immunoblotting and qRT-PCR. Consistent with siRNA findings, accumulation of DBP transcript  
279 and protein was not affected, but viral late gene products were significantly reduced in METTL3  
280 KO cells (**Supp Figure 2a,b**). Finally, we blocked methylation by treating cells with the small  
281 molecule inhibitor 3-Deazadenosine (DAA) at the time of infection. DAA is an S-  
282 Adenosylmethionine synthesis inhibitor that has preferential effects on m<sup>6</sup>A deposition when  
283 used at low concentrations<sup>62</sup>. Although treatment with DAA reduced early gene protein  
284 expression and DNA replication more than METTL3 knockdown or knockout, the most robust

285 effects observed were reductions in the amount of viral late gene transcripts, protein production,  
286 and plaque forming units (**Supp Figure 2c-f**). Overall, these data highlight a preferential effect  
287 of m<sup>6</sup>A addition at late stages of the viral infectious cycle, with viral early gene transcription and  
288 genome replication largely unaffected while late RNAs, late proteins, and infectious progeny  
289 production are greatly reduced in the absence of m<sup>6</sup>A.

290 Two groups have recently highlighted that in primary cells m<sup>6</sup>A destabilizes the *IFNB1*  
291 transcript, such that loss of METTL3 results in increased production of IFNβ<sup>40,41</sup>. When these  
292 cells were infected with viruses, including by adenovirus serotype 4, they restricted viral  
293 infectivity through indirect priming of the interferon pathway. To determine if loss of METTL3  
294 similarly increased *IFNB1* and innate immune-related transcripts in our experiments, we used  
295 siRNA to knock down METTL3 for 48 hours prior to infection with Ad5 either in the presence or  
296 absence of ruxolitinub, a JAK/STAT inhibitor that blocks signaling downstream of type-I  
297 interferons such as IFNβ (**Figure 6a**). As a positive control for interferon activation and the  
298 efficacy of ruxolitinub, uninfected cells were transfected with poly(I:C) as a surrogate viral RNA  
299 agonist. Our data demonstrate that in A549 cells, neither type-I interferon (*IFNB1*) or type-III  
300 interferon (*IFNL1*) transcripts are induced by Ad5 infection or METTL3 depletion, whereas  
301 poly(I:C) transfection induces these transcripts several hundred-fold. Furthermore, expression of  
302 interferon-stimulated genes such as *MX1* and *OAS1* was blocked downstream of poly(I:C)  
303 transfection by JAK inhibition but not induced by viral infection or METTL3 knockdown.  
304 Additionally, blocking the interferon pathway with JAK inhibition did not alter the specific  
305 decrease in viral late gene transcripts with METTL3 depletion previously described (**Figure 6b**).  
306 Overall these data suggest a specific role for m<sup>6</sup>A in altering accumulation of late adenoviral  
307 RNA transcripts at late stages of the adenoviral infectious cycle, independent of innate immune  
308 activation, in the cell types we used.

309

### 310 **Cytoplasmic readers and m<sup>6</sup>A erasers do not affect the adenoviral infectious cycle**

311 Since we found that loss of the m<sup>6</sup>A writer METTL3 resulted in decreases in viral late  
312 gene transcripts and proteins, we next examined whether loss of m<sup>6</sup>A erasers led to increases  
313 in viral protein production. We used siRNA to knockdown either ALKBH5 or FTO in A549 cells  
314 and performed a time-course infection with Ad5. There was no defect in either viral early  
315 proteins or late proteins with either ALKBH5 or FTO knockdown (**Supp Figure 3a**).  
316 Furthermore, when assaying viral DNA replication by qPCR or infectious particle production by  
317 plaque forming units after knockdown of the two erasers, we saw less than 3-fold or non-  
318 significant changes (**Supp Figure 3b,c**). Using siRNA in A549 cells, we were able to knock

319 down the cytoplasmic m<sup>6</sup>A reader proteins YTHDF1-3 efficiently (**Supp Figure 3d**) but did not  
320 observe changes in viral protein production (**Supp Figure 3e**). These results highlight that  
321 whatever amount of m<sup>6</sup>A deposition is necessary for adenoviral function, removal of ALKBH5  
322 and FTO does not increase m<sup>6</sup>A beyond necessary levels.

323

### 324 **Splicing efficiency of late viral RNA is mediated by m<sup>6</sup>A**

325 We investigated various mechanisms to explain the differential impact of m<sup>6</sup>A on early  
326 and late viral RNAs. To rule out the role of transcription in masking effects of this post-  
327 transcriptional modification, we examined early and late promoter activity by profiling nascent  
328 RNA transcription with a 4-thiouridine (4sU) labeling approach<sup>63</sup>. After 24 hour infection of A549  
329 cells with Ad5 following knockdown of METTL3, nascent RNA was labeled with 4sU for the last  
330 ten minutes of infection. Total RNA was harvested, nascent RNA conjugated with biotin, and  
331 precipitated for analysis by qRT-PCR with primers to viral transcripts. We examined unspliced  
332 regions of viral RNA near the early E1A and E4 regions, as well as within the tripartite leader of  
333 the Major Late Promoter (MLP) that precedes nearly all adenovirus late genes. While relative  
334 transcription of the E1A promoter was increased two-fold after METTL3 knockdown, a separate  
335 early promoter (E4), and the viral late promoter itself showed no significant change (**Figure 7a**).  
336 Furthermore, by comparing 4sU-labeled nascent RNA to total RNA, we observed no significant  
337 change in the RNA decay rate of spliced viral early and late genes after METTL3 knockdown  
338 (**Figure 7b**). These data imply that adenoviral infections reach the late stage of the viral  
339 infectious cycle in cells lacking METTL3, yet still accumulate fewer late viral RNAs.

340 Besides transcription from the MLP, which is dependent on viral DNA replication, the  
341 other major difference between early and late viral transcripts is the sheer number of alternative  
342 splicing and polyadenylation events that must take place to generate mature mRNAs. While  
343 most early transcripts contain only one splice junction and no more than two potential poly(A)  
344 sites, the major late transcriptional unit has over 25 splice acceptors and 5 major sites of  
345 polyadenylation, leading to over 20 functional open reading frames. Mounting evidence  
346 suggests that m<sup>6</sup>A and the nuclear reader YTHDC1 can regulate mRNA splicing<sup>7,37</sup>. We used  
347 qRT-PCR to measure spliced and unspliced viral RNAs and determined the splicing efficiency of  
348 a particular transcript as a ratio of these two products (**Figure 7c**). We examined the m<sup>6</sup>A-  
349 marked transcripts E1A (early gene) and Fiber (late gene) as representative of their kinetic  
350 classes. Of note, Fiber is the only late gene that can be incorporated into this type of qPCR  
351 assay, since no other intron amplifying primer set within the late gene transcriptional unit is  
352 specific to a single gene. Upon knockdown of METTL3 or WTAP, the splicing efficiency of the

353 E1A gene did not change, whereas the splicing efficiency of Fiber significantly decreased  
354 (**Figure 7d**). The loss of Fiber splicing efficiency was phenocopied by METTL3 knockout  
355 (**Figure 7e**), as well as by knockdown of the nuclear m<sup>6</sup>A reader protein YTHDC1 (**Figure 7f**).  
356 This decreased splicing efficiency appears to explain the total RNA decrease in viral late genes  
357 as well as the decrease in protein expression, since both METTL3 and WTAP knockdown lead  
358 to significant losses in viral late gene proteins (**Figure 7g**). A similar result was observed with  
359 knockdown of YTHDC1, although to a much lesser degree.

360 To assay the role of m<sup>6</sup>A *in cis* on viral transcript splicing we turned to a transgene  
361 splicing assay in which we can ablate m<sup>6</sup>A sites (**Figure 7h**). In this system, we generated a  
362 construct with an exogenous plasmid-based promoter to drive expression of an RNA containing  
363 the splice donor exon of the viral late tripartite leader, as much intervening Fiber intron as  
364 possible without including additional viral genes or splice sites, and the 5' region of Fiber that  
365 encompasses the meRIP-seq peak. This viral cassette was fused to a *Renilla* luciferase gene in  
366 which all m<sup>6</sup>A DRACH motifs were silently mutated<sup>34</sup>. These constructs allow transgene  
367 expression with wild-type viral context (WT Fiber), or with all 15 DRACH sites present in both  
368 exonic and intronic regions silently mutated to ablate deposition of METTL3-dependent m<sup>6</sup>A  
369 (m<sup>6</sup>A Mut Fiber, mutations shown below in **Figure 7h**). Potential intronic sites were also ablated,  
370 since both meRIP-seq and direct RNA sequencing were performed on polyadenylated mRNA  
371 and would not have detected potential m<sup>6</sup>A sites within introns. HeLa cells were depleted of  
372 METTL3 with siRNA for 48 hours before the respective transgene plasmids were transfected  
373 into uninfected cells and incubated for a further 24 hours. Using this system, splicing efficiency  
374 is read out with qRT-PCR using the primers for endogenous Fiber splicing. Upon knockdown of  
375 METTL3, the WT Fiber construct showed a decrease in splicing efficiency (**Figure 7i**), similar to  
376 that observed during viral infection (**Figure 7d**). Importantly, m<sup>6</sup>A Mut Fiber showed a similar  
377 decrease in splicing efficiency when compared to the WT Fiber construct during control siRNA  
378 knockdown, and had no further decrease upon METTL3 knockdown (**Figure 7i**). Overall, these  
379 data suggest m<sup>6</sup>A positively regulates the splicing reaction of viral late transcripts.

380

### 381 **METTL3 knockdown globally dysregulates adenoviral late RNA processing**

382 To determine if m<sup>6</sup>A positively regulates the splicing of all late transcripts, we returned to  
383 two orthologous sequencing technologies, short-read sequencing and long-read direct RNA  
384 sequencing. Due to the limitations of short-read mapping to viral genomes with overlapping  
385 transcripts, standard expression algorithms such as mapped fragments per kilobase transcript  
386 per million base pairs (FPKM) cannot be used to quantify these viral transcripts accurately.

387 Instead, we focused exclusively on the short reads that contained splice junctions, allowing  
388 unambiguous assignment to one viral transcript. Since our RNA-seq library preparation was  
389 strand-specific, this allowed us to map reads accurately to their strand of origin. Furthermore,  
390 we were able to address intron retention of the late transcriptional unit by counting only  
391 unspliced reads overlapping the major splice donor in the third exon of the tripartite leader  
392 (intron retention, IR). This strategy is schematized for top-strand viral genes (**Figure 8a**). When  
393 we applied this technique to adenovirus-infected A549 cells after METTL3 knockdown, we  
394 observed that the prevalence of early gene splice junctions was largely unchanged (**Figure 8b**).  
395 Of these, E1B-19K appears to be an outlier, since the prevalence of this particular splice  
396 junction increases as the virus moves into the late stage, and a potential ORF of this transcript  
397 encodes for protein IX, an alternate promoter-driven adenovirus late gene. When we performed  
398 this analysis on late gene splice sites, we observed that every late gene originating from the  
399 major late promoter was significantly decreased, and that intron retention in this transcriptional  
400 unit was increased, consistent with our previous results. The only exception we detected was  
401 the first possible alternative splice junction encoding L1-52K, which was unchanged.

402 While short reads targeting splice junctions provided high depth quantitative results, we  
403 turned to long-read sequencing with unambiguous transcript mapping as an orthogonal  
404 technique to validate these results. We counted full-length RNA transcripts after infection of  
405 METTL3 knockdown A549 cells normalized to the read depth of the experiment (**Figure 8c**).  
406 Confirming the short-read sequencing data, we saw that early transcripts were essentially  
407 unaffected by loss of METTL3, while the overall abundance of every viral late transcript, except  
408 L1-52K, was decreased. Overall, these data highlight that METTL3 promotes the expression  
409 and splicing efficiency of the alternatively spliced viral late transcriptional unit.

410

## 411 **Discussion**

412 In this work we have identified sites of m<sup>6</sup>A methylation in both cellular and viral  
413 transcripts during infection with adenovirus. Using a conventional antibody-based approach to  
414 detect m<sup>6</sup>A, we discovered that both viral early and late kinetic classes of mRNA were modified.  
415 To identify m<sup>6</sup>A within overlapping viral transcripts, we devised a technique to predict METTL3-  
416 dependent methylation sites in full-length RNAs using direct RNA sequencing. This technique  
417 identified specific m<sup>6</sup>A sites at nucleotide resolution within m<sup>6</sup>A-enriched regions, and revealed  
418 adenovirus RNA isoform-dependent sites of methylation. Ultimately, we found that m<sup>6</sup>A addition  
419 in the alternatively spliced viral late transcripts was important for mediating the efficiency of

420 splicing and accumulation of these messages leading to productive infection. Taken together,  
421 this work demonstrates m<sup>6</sup>A-mediated control over the splicing of viral transcripts.

422 We also defined a new method for isoform-specific m<sup>6</sup>A detection within complex  
423 transcriptomes. Compared to conventional antibody-based approaches, direct detection of m<sup>6</sup>A  
424 modification in RNA provides many advantages. Focusing on adenovirus RNAs, we show that  
425 our technique is highly reproducible between biological replicates with a very low false-positive  
426 rate (here defined as candidates that did not map within five nucleotides of an AC dinucleotide).  
427 In fact, after candidate site masking, greater than 80% of all sites mapped directly to the  
428 adenine within an AC dinucleotide, with the rest often mapping within four nucleotides. This is  
429 consistent with the fact that nanopores read RNA in a five nucleotide window<sup>59</sup>. While we  
430 demonstrate this method by assaying for METTL3-dependent m<sup>6</sup>A modifications, theoretically  
431 this technique could work for other RNA modifications where the writing enzyme is known, such  
432 as methyl-5-cytosine and pseudouridine<sup>44,45</sup>. Compared to other single-nucleotide resolution  
433 approaches to m<sup>6</sup>A detection<sup>48-50</sup>, direct RNA sequencing avoids the known biases associated  
434 with antibody targeting<sup>51</sup> and cDNA synthesis<sup>42,49</sup> and, unlike endoribonuclease cutting<sup>50</sup>, is not  
435 specific to a small subset of methylated motifs. Currently, our technique works best with  
436 samples of high read-depth, and is thus ideally suited to the study of viruses that take over the  
437 RNA processing of their host cell. However, with improvements in nanopore sequencing  
438 technologies such as the PromethION which can yield much higher read depth, this technique  
439 should be scalable to the study of cellular transcripts as well.

440 The lack of long-read assays to map m<sup>6</sup>A methylation has hampered the identification of  
441 transcript isoform-specific modifications. While our method still does not enable single molecule  
442 resolution, the ability to aggregate similar isoforms in bulk using the long reads produced  
443 through direct RNA sequencing allows for isoform-level prediction of m<sup>6</sup>A sites. Indeed, we  
444 demonstrate that isoform-level identification was more sensitive for the detection of potential  
445 m<sup>6</sup>A sites in adenovirus mRNA than the aggregate exome-level data by as much as four-fold.  
446 While isoform-level alignment and filtering rely on quality annotations, this technique may need  
447 additional customization based on transcript structures in the target of choice. Furthermore, we  
448 have only shown the efficacy of this design on polyadenylated messenger RNA. Further studies  
449 focusing on non-adenylated or nascent RNAs should prove highly informative for defining the  
450 role of m<sup>6</sup>A-mediated regulation within introns and structural RNAs.

451 While the influence of m<sup>6</sup>A on splicing has been widely reported in both viral and cellular  
452 contexts<sup>7,8,37,64</sup>, this finding has not been without controversy<sup>65</sup>. One study in particular showed  
453 that while m<sup>6</sup>A can be detected in nascent pre-mRNA, these locations do not change upon RNA

454 maturation and nuclear export<sup>15</sup>. Furthermore, knockout of METTL3 in mouse embryonic stem  
455 cells led to no detectable change in cassette exon splicing<sup>15</sup>. In general, our findings agree with  
456 this as we do not see the global loss of any particular viral splicing event in the absence of  
457 METTL3, only a decrease in total amount of spliced transcripts. However, we did find that m<sup>6</sup>A  
458 modifications present in adenoviral late transcripts increase the splicing efficiency of these  
459 RNAs. This result is consistent with the results of others that have found that the presence of  
460 m<sup>6</sup>A near splice sites correlates with the rate and efficiency of splicing when studied in a time-  
461 resolved fashion in nascent RNA<sup>66</sup>. Furthermore, it is known that unspliced cellular RNAs  
462 resident in the nucleus can be targeted for decay by the nuclear exosome<sup>67,68</sup>. Therefore, our  
463 hypothesis is that efficient splicing requires m<sup>6</sup>A and leads to the accumulation of mature  
464 mRNAs that would otherwise be destroyed.

465 The m<sup>6</sup>A modification has also been implicated in the regulation of alternative  
466 polyadenylation<sup>47,64</sup>. While the majority of the adenovirus early transcripts that were insensitive  
467 to METTL3 knockdown contain only one cleavage and polyadenylation site, the adenovirus late  
468 transcriptional unit contains five poly(A) sites, and usage must be regulated to be able to splice  
469 the downstream isoforms. It is intriguing to note that transcripts generated from the L1 region  
470 upstream of the first polyadenylation site were the viral late transcripts least affected by  
471 METTL3 knockdown. While our quantitative PCR reaction to test the splicing efficiency of the L5  
472 region cannot fully rule out the possibility of fewer transcripts reaching this region due to altered  
473 poly(A) cleavage, our splicing reporter transgene assay that does not contain upstream poly(A)  
474 sites argues against this hypothesis. Splicing and polyadenylation are thought to happen co-  
475 transcriptionally<sup>69</sup>, and any effect that m<sup>6</sup>A might have on coordinating these processes remains  
476 an interesting topic for future study.

477 In summary, we discovered that while both early and late adenoviral genes are marked  
478 by m<sup>6</sup>A, we only detected a loss of expression within late genes after depletion of METTL3. This  
479 was because m<sup>6</sup>A increased the efficiency of splicing within adenovirus late transcriptional units,  
480 where a plethora of potential splice sites leads to an abundance of alternative splice isoforms.  
481 Our data show that even when rates of transcription and RNA decay remain constant, increased  
482 splicing efficiency can lead to increased transcript abundance, presumably via protection  
483 against nuclear decay mechanisms that target unspliced transcripts. This work highlights how  
484 RNA modifications can regulate distinct stages of viral gene expression.

485

## 486 **Materials and Methods**

487

### 488 **Cell Culture**

489 All cell lines were obtained from American Type Culture Collection (ATCC) and cultured  
490 at 37 °C and 5% CO<sub>2</sub>. All cell lines tested negative for mycoplasma infection and were routinely  
491 tested afterwards using the LookOut Mycoplasma PCR Detection Kit (Sigma-Aldrich). A549  
492 cells (ATCC CCL-185) were maintained in Ham's F-12K medium (Gibco, 21127-022)  
493 supplemented with 10% v/v FBS (VWR, 89510-186) and 1% v/v Pen/Strep (100 U/ml of  
494 penicillin, 100 µg/ml of streptomycin, Gibco, 15140-122). HeLa cells (ATCC CCL-2) and  
495 HEK293 cells (ATCC CRL-1573) were grown in DMEM (Corning, 10-013-CV) were grown in  
496 DMEM supplemented with 10% v/v FBS and 1% v/v Pen/Strep.

497

### 498 **Viral Infection**

499 Adenovirus serotype 5 (Ad5) was originally purchased from ATCC. All viruses were  
500 expanded on HEK293 cells, purified using two sequential rounds of ultracentrifugation in CsCl  
501 gradients, and stored in 40% v/v glycerol at -20 °C (short term) or -80 °C (long term). Viral stock  
502 titer was determined on HEK293 cells by plaque assay, and all subsequent infections were  
503 performed at a multiplicity of infection (MOI) of 20 PFU/cell. Cells were infected at 80-90%  
504 confluent monolayers by incubation with diluted virus in a minimal volume of low serum (2%) F-  
505 12K for two hours. After infection viral inoculum was removed by vacuum and full serum growth  
506 media was replaced for the duration of the experiment.

507

### 508 **Plasmids, siRNA, and transfections**

509 Fiber-Transgene constructs were created from the previously generated m<sup>6</sup>A-null  
510 psiCheck2 reporter plasmid<sup>34</sup>, where both Firefly and Renilla luciferase genes have all m<sup>6</sup>A-  
511 DRACH motifs ablated by silent mutations. The original 3'UTR reporter was removed from the  
512 end of *Renilla* luciferase using *XhoI* and *NotI* restriction enzymes and this site was healed by  
513 the insertion of a recombinant multiple cloning site containing *XhoI*, *AgeI*, and *NotI* using two  
514 annealed DNA oligos with complementary sticky ends (Obtained from IDT). From this reporter  
515 construct lacking significant 3'UTR, the chimeric intron downstream of the SV40 promoter and  
516 upstream of *Renilla* luciferase was excised using *StuI* and *NheI*. Using compatible cut sites, a  
517 DNA fragment was cloned into this site encoding the third exon of the Ad5 late gene unit  
518 (nucleotides 9,644 to 9,733), all intervening intron that did not contain other Ad5 genes or splice  
519 sites (nucleotides 9,733 to 10,631 and 30,867 to 31,042), and the first 482 nucleotides of the



520 Fiber exon and ORF (31,042 to 31,524) such that the Fiber ORF would continue in frame to the  
521 *Renilla* luciferase ORF (WT Fiber). Alternatively, the same fragment but with all 15 DRACH  
522 motifs silently mutated was used to generate m<sup>6</sup>A Mut Fiber. Both fragments were excised from  
523 plasmids created as a PriorityGENE service from GeneWiz from provided sequences. All DNA  
524 oligos can be found in **Table 1**. DNA transfections were performed using the standard protocol  
525 for Lipofectamine2000 (Invitrogen).

526 The following siRNA pools were obtained from Dharmacon: non-targeting control (D-  
527 001206-13-05), METTL3 (M-005170-01-0005), METTL14 (M-014169-00-0005), WTAP (M-  
528 017323-02-0005), YTHDC1 (M-015332-01-0005), FTO (M-004159-01-0005), and ALKBH5 (M-  
529 004281-01-0005). The following siRNAs were obtained from Qiagen: YTHDF1 (SI00764715),  
530 YTHDF2 (SI04174534), YTHDF3 (SI04205761), FTO (SI04177530), and ALKBH5  
531 (SI04138869). All siRNA transfections were performed using the standard protocol for  
532 Lipofectamine RNAiMAX (Invitrogen). Poly(I:C) was provided pre-complexed with transfection  
533 reagent (Invivogen tlrl-piclv), and was reconstituted fresh with molecular grade water before  
534 added to cells at a concentration of 500 ng/mL.

535

### 536 **METTL3 Knockout**

537 Since METTL3 has previously been reported to be an essential gene, a rescue cell line  
538 was pre-constructed that contained a CRISPR-insensitive METTL3 transgene under a  
539 tetracycline-inducible promoter. In brief, the 2X-Flag Tagged METTL3 transgene<sup>32</sup> was cloned  
540 from pEFTak into the BB726<sup>70</sup> entry vector and the NGG Cas9 PAM site at nucleotide position  
541 117 (G to C) was silently mutated via the Stratagene QuickChange Site-Directed Mutagenesis  
542 protocol (primer sequence in **Table 1**). This plasmid was then co-transfected into A549 HiLo  
543 cells with a transiently expressed Cre Recombinase before being selected by puromycin<sup>70</sup>. This  
544 allows integration of METTL3 into a conserved tetracycline-regulated genomic locus, and  
545 expression was tested both by immunoblot and immunofluorescence for selection efficiency.

546 GFP-Cas9 expressing plasmid pX330<sup>71</sup> was constructed to contain the single guide RNA  
547 (**Table 1**) from the GECKO CRISPR library. The A549-METTL3-HiLo cell line was then induced  
548 to express Cas9-insensitive METTL3 for one day before transfected with the single pX330  
549 plasmid containing both GFP-Cas9 and METTL3 sgRNA. 24 hours post transfection, GFP  
550 expressing cells were sorted as single cells by fluorescence-activated cell sorting (FACS) into  
551 96-well plates for clonal expansion. Tetracycline was refreshed biweekly to maintain transgene  
552 expression for the entire outgrowth until resulting cell lines reached large enough numbers to be  
553 viably frozen. Afterwards, tetracycline was withdrawn and cells were cultured for a further two

554 weeks before the presence of endogenous METTL3 was assayed for by both immunoblot and  
555 immunofluorescence. Two clones were picked that displayed undetectable levels of  
556 endogenous METTL3 at the single cell level, and Cas9-mediated lesions were detected by  
557 Sanger sequencing of a PCR amplicon derived from genomic DNA (PureLink Genomic DNA kit,  
558 Invitrogen).

559

### 560 **meRIP-Seq and meRIP-qPCR**

561 A549 cells in 10 cm plates were lysed directly in TRIzol (Thermo Fisher) and RNA was  
562 extracted and DNaseI treated (Qiagen). Poly(A) RNA was selected with the Poly(A)Purist MAG  
563 Kit before being fractionated (Thermo Fisher) with RNA Fragmentation Reagents (Thermo  
564 Fisher) and ethanol precipitated. For meRIP-qPCR the following protocol was identical but RNA  
565 was not poly(A) purified or fragmented. MeRIP was performed using the EpiMark N6-  
566 methyladenosine Enrichment Kit (NEB) following manufacturer's instructions. The following  
567 modifications were made following the previously published protocol<sup>32</sup>. Immunoprecipitations  
568 were washed with low and high salt wash buffers and RNA was eluted from the beads with 5  
569 mM m<sup>6</sup>A salt (Santa Cruz Biotechnology).

570 For meRIP-Seq RNA-seq libraries were prepared from both eluate and 10% input mRNA  
571 using the TruSeq mRNA library prep kit (Illumina), subjected to quality control (MultiQC), and  
572 sequenced on the HiSeq4000 instrument. Both the IP and input samples were mapped to the  
573 GRCh37/hg19 genome assembly and the Ad5 genome using the RNA-seq aligner GSNAP<sup>72</sup>  
574 (version 2019-09-12) or STAR<sup>73</sup>. We called peaks using MACS2<sup>74</sup> with the following flags: "-q  
575 0.05 -B --call-summits --keep-dup auto --nomodel --extsize 150". HOMER<sup>75</sup> was then used to  
576 identify motifs enriched in the identified m<sup>6</sup>A-peaks. Metagene analysis and visualization was  
577 done using deepTools<sup>76</sup>.

578

### 579 **Antibodies, Immunoblotting, and Immunofluorescence**

580 The following primary antibodies were used for cellular proteins: METTL3 (Novus  
581 Biologicals H00056339, WB: 1:400, IF: 1:50), METTL14 (Sigma-Aldrich HPA038002, WB:  
582 1:5000, IF: 1:100), WTAP (Proteintech 60188, WB: 1:400, IF: 1:100), YTHDC1 (Abcam  
583 ab122340, WB: 1:2000, IF: 1:100), YTHDF1 (Abcam ab99080, WB: 1:500, IF: 1:100), YTHDF2  
584 (Proteintech 24744-1-AP, WB: 1:1000, IF: 1:100), YTHDF3 (Sigma-Aldrich SAB2102735, WB:  
585 1:500), FTO (Abcam ab92821, WB: 1:300, IF: 1:100), ALKBH5 (Sigma-Aldrich SAB1407587,  
586 WB: 1:250, IF: 1:100),  $\beta$ -Actin (Sigma-Aldrich A5441-100UL, WB 1:5000), GAPDH (GeneTex  
587 41577, WB:1:20,000), and RNA Pol II p-Ser2 (Abcam ab5095, IF: 1:400). Primary anti-Flag tag

588 antibody was obtained from Sigma-Aldrich (F7425-.2MG, WB 1:2000). Primary antibodies  
589 against viral proteins were obtained from: rabbit polyclonal against adenovirus Hexon, Penton,  
590 and Fiber (Gift from J. Wilson, WB 1:10,000), mouse anti-DBP (Gift from A. Levine, Clone: B6-8,  
591 WB 1:1000, IF 1:400), polyclonal rabbit anti-DBP (Gift from A. Levine, IF: 1:40,000), mouse anti-  
592 E1A (BD 554155, WB: 1:500), and mouse anti-E1B55K (Gift from A. Levine, Clone: 58K2A6,  
593 WB 1:500).

594 For western immunoblotting protein samples were prepared by directly lysing cells in  
595 lithium dodecyl sulfate (LDS) loading buffer (NuPage) supplemented with 1% beta-  
596 mercaptoethanol (BME) and boiled at 95 °C for 10 min. Equal volumes of protein lysate were  
597 separated SDS-PAGE in MOPS buffer (Invitrogen) before being transferred onto a nitrocellulose  
598 membrane (Millipore) at 35 V for 90 minutes in 20% methanol solution. Membranes were  
599 stained with Ponceau to confirm equal loading and blocked in 5% w/v non-fat milk in TBST  
600 supplemented with 0.05% w/v sodium azide. Membranes were incubated with primary  
601 antibodies in milk overnight, washed for three times in TBST, incubated with HRP-conjugated  
602 secondary (Jackson Laboratories) for 1 h and washed an additional three times in TBST.  
603 Proteins were visualized with Pierce ECL or Femto Western Blotting Substrate (Thermo  
604 Scientific) and detected using a Syngene G-Box. Images were processed and assembled in  
605 Adobe Photoshop and Illustrator CS6.

606 For immunofluorescence A549 cells were grown on glass coverslips in 24-well plates,  
607 mock-infected or infected with Ad5 for 18 hours, washed twice with PBS and then fixed in 4%  
608 w/v Paraformaldehyde for 15 minutes. Cells were permeabilized with 0.5% v/v Triton-X in PBS  
609 for 10 mins, and blocked in 3% w/v BSA in PBS (+ 0.05% w/v sodium azide) for one hour.  
610 Primary antibody dilutions were added to coverslips in 3% w/v BSA in PBS (+ 0.05% w/v  
611 sodium azide) for 1 h, washed with 3% BSA in PBS three times, followed by secondary  
612 antibodies and 4,6-diamidino-2-phenylindole (DAPI) for one hour. Secondary antibodies were  
613 Alexa-Fluor 488, 555, or 568 in anti-mouse or anti-rabbit (Invitrogen). Coverslips were mounted  
614 onto glass slides using ProLong Gold Antifade Reagent (Cell Signaling Technologies).  
615 Immunofluorescence was visualized using a Zeiss LSM 710 Confocal microscope (Cell and  
616 Developmental Microscopy Core at UPenn) and ZEN 2011 software. Images were processed in  
617 FIJI and assembled in Adobe Photoshop and Illustrator CS6.

618

### 619 **Inhibitors and Small Molecules**

620 3-Deazadenosine was purchased from Sigma-Aldrich (D8296) and resuspended in  
621 Dimethyl Sulfoxide (DMSO) before being added to cells at the time of infection to a final

622 concentration of 25  $\mu$ M. Ruxolitinub was purchased from Sigma-Aldrich (G-6185) and  
623 resuspended in DMSO before being added to cells immediately prior to infection with Ad5 or  
624 transfection with poly(I:C) at a final concentration of 4  $\mu$ M.

625

### 626 **RNA Isolation and qPCR**

627 Total RNA was isolated from cells by either TRIzol extraction (Thermo Fisher) or  
628 RNeasy Micro kit (Qiagen), following manufacturer protocols. RNA was treated with RNase-free  
629 DNase I (Qiagen), either on-column or after ethanol precipitation. RNA was converted to  
630 complementary DNA (cDNA) using 1  $\mu$ g of input RNA in the High Capacity RNA-to-cDNA kit  
631 (Thermo Fisher). Quantitative PCR was performed using the standard protocol for SYBR Green  
632 reagents (Thermo Fisher) in a QuantStudio 7 Flex Real-Time PCR System (Applied  
633 Biosystems). All primers were used at 10  $\mu$ M and sequences can be found in **Table 1**. All values  
634 were normalized by the  $\Delta\Delta$ Ct method by normalizing first to internal controls such as HPRT1  
635 and GAPDH.

636

### 637 **Viral DNA Replication qPCR**

638 Infected cells were harvested at the indicated time points post infection by trypsin and  
639 total DNA was harvested using the PureLink Genomic DNA kit (Invitrogen). DNA quantity was  
640 assessed by qPCR and SYBR green reagents using primers for genomic regions of Ad5 and  
641 normalized to cellular tubulin (See **Table 1** for primer sequence). Entry of the viral genome was  
642 assessed at the 4 hour infection time point, and all subsequent values were normalized to this  
643 by the  $\Delta\Delta$ Ct method.

644

### 645 **Plaque Assays**

646 Infected cells seeded in 12-well plates were harvested by scraping at the indicated time  
647 points and lysed by three cycles of freeze-thawing in liquid nitrogen. Cell debris was removed  
648 from lysates by centrifugation at max speed (21,130 g), 4°C, 5 min. Lysates were serially diluted  
649 in DMEM supplemented with 2% v/v FBS and 1% v/v Pen/Strep to infect a confluent monolayer  
650 of HEK293 cells seeded in 12-well plates. After incubation for 2 h at 37 °C, the infection media  
651 was removed, and cells were overlaid with DMEM containing 0.45% w/v SeaPlaque agarose  
652 (Lonza) in addition to 2% v/v FBS and 1% v/v Pen/Strep. Plaques were stained using 1% w/v  
653 crystal violet in 50% v/v ethanol between 6 to 7 days post-infection.

654

### 655 **Metabolic Labeling of RNA for Transcription and Half-life determination**

656 To assess relative RNA transcription rate and RNA half-life, cells were treated with 1 mM  
657 4-thiouridine (4sU; Sigma T4509) for exactly 10 minutes. Infection was stopped and RNA  
658 harvested using 1 mL TRIzol (Thermo Fisher), following manufacturer's instructions. A fraction  
659 of the total RNA was reserved as input, and the remaining 4sU-labeled nascent RNA was  
660 biotinylated using MTSEA-Biotin-XX (Biotium, 90066) as previously described<sup>63,77</sup>. Nascent RNA  
661 was separated from unlabeled RNA using MyOne C1 Streptavidin Dynabeads (Thermo Fisher  
662 Scientific, 65-001), biotin was removed from nascent RNA using 100 mM dithiothreitol (DTT),  
663 and RNA was isopropanol precipitated. One  $\mu$ g of total RNA (T) and an equivalent volume of  
664 nascent RNA (N) were converted to cDNA and qPCR was performed as described above.  
665 Relative transcription rates were determined by the  $\Delta\Delta$ Ct method to compare nascent transcript  
666 levels between control and siRNA treated cells normalized to nascent GAPDH RNA. RNA half-  
667 life was determined using the previously described formula  $t_{0.5} = -t \times [\ln(2)/DR]$  where t is the  
668 4sU labeling time (0.16667 hours) and DR is the decay rate defined as Nascent/Total RNA<sup>78</sup>.  
669 Half-lives were normalized to the half-life of GAPDH set at 8 hours as previously determined<sup>79</sup>.

670

### 671 **RNA-sequencing**

672 Total RNA from three biological replicates of Control knockdown or three biological  
673 replicates of METTL3-knockdown A549 cells infected with Ad5 for 24 hours were sent to  
674 Genewiz for preparation into strand-specific RNA-Seq libraries. Libraries were then run spread  
675 over three lanes of an Illumina HiSeq 2500 using a 150bp paired-end protocol. Raw reads were  
676 mapped to the GRCh37/hg19 genome assembly and the Ad5 genome using the RNA-seq  
677 aligner GSNAP<sup>72</sup> (version 2019-09-12). The algorithm was given known human gene models  
678 provided by GENCODE (release\_27\_hg19) to achieve higher mapping accuracy. We used R  
679 package ggplot2 for visualization. Downstream analysis and visualization was done using  
680 deepTools<sup>76</sup>. Splice junctions were visualized in Integrative Genomics Viewer using the  
681 junctions output from GSNAP.

682

### 683 **Nanopore Direct RNA Sequencing**

684 Direct RNA sequencing libraries were generated from 680 – 1,800 ng of poly(A) RNA,  
685 isolated using the Dynabeads™ mRNA Purification Kit (Invitrogen, 61006). Isolated poly(A)  
686 RNA was subsequently spiked with 0.3  $\mu$ l of a synthetic Enolase 2 (ENO2) calibration RNA  
687 (Oxford Nanopore Technologies Ltd.) and prepared for sequencing as described previously<sup>56,59</sup>  
688 Sequencing was performed on a MinION Mk1b using R9.4.1 (rev D) flow cells (Oxford Nanopore  
689 Technologies Ltd.) for 18 – 23 hours (one library per flowcell) and yielded between 1,000,000 –

690 2,000,000 reads per dataset. Raw fast5 datasets were then basecalled using Guppy v3.2.2 (-f  
691 FLO-MIN106 -k SQK-RNA002) with only reads in the pass folder used for subsequent analyses.  
692 Sequence reads were aligned against the adenovirus Ad5 genome, using MiniMap2 (-ax splice -  
693 k14 -uf --secondary=no), a splice aware aligner<sup>61</sup>, with subsequent parsing through SAMtools<sup>80</sup>  
694 and BEDtools<sup>81</sup>. Here sequence reads were filtered to retain only primary alignments (SAM  
695 FLAG 0 (top strand) or 16 (bottom strand)). Coverage plots (Figure 2 and 4) were generated  
696 using the R packages Gviz<sup>82</sup> and GenomicRanges<sup>83</sup>. For isoform-level analysis, sequence  
697 reads were aligned against an adenovirus Ad5 transcriptome, derived from the latest  
698 annotation, using MiniMap2. Subsequent parsing with SAMtools was used to filter out sequence  
699 reads that could not be unambiguously assigned to a single transcript. Here, only primary  
700 alignments (SAM flag 0) with mapping qualities (MapQ) > 0 were retained.

701

### 702 **Nucleotide Resolution Analysis of m<sup>6</sup>A Sites using Direct RNA Sequencing**

703 For both exome and isoform level analyses, the aligned sequence datasets were  
704 individually parsed in a stranded manner using BAM Readcount  
705 (<https://github.com/genome/bam-readcount>) to yield base-call distributions (i.e. the number of A,  
706 C, G, U, and indels) at each position in the alignment. For each comparison (e.g. M3KO vs WT),  
707 a G-test was performed on the base-call distributions at each position in each dataset with  
708 subsequent Bonferroni correction for multiple testing. Positions with a read coverage of < 100x  
709 in one or both datasets being compared were excluded from this analysis. To further filter the  
710 dataset following the G-test, we calculated the ratio of match:mismatch fractions at each  
711 position. Candidate sites were those that gave a statistically significant G-test result (bonferroni  
712 adjusted p < 0.01) and had a one-fold or higher reduction in the match:mismatch fraction in the  
713 WT dataset compared to the METTL3 knockout dataset. Subsequent masking was performed  
714 by collapsing all sites located within five nucleotides of the same NNACN motif into a single  
715 representative, chosen by picking the site with highest G-test score. Where sites were located  
716 within ten nucleotides of each other, but further than five nucleotides from an NNACN motif,  
717 collapsing was performed by selecting the site with the highest G-test score.

718

## 719 **Acknowledgments**

720 We extend special thanks to Ian Mohr (New York University School of Medicine) for his  
721 many insightful comments and for support of DPD in part through National Institutes of Health  
722 (NIH) grants R01-AI073898 and R01-GM056927. We also thank members of the Weitzman and  
723 Mohr/Wilson Labs for insightful discussions and input. We are grateful to A. Berk, P. Branton, G.  
724 Ketner, A. Levine, and D. Ornelles for generous gifts of reagents. We thank our colleagues  
725 Kristen Lynch, Fange Liu, and Peter Choi for helpful suggestions and careful reading of the  
726 manuscript. We thank the UPenn Cell and Developmental Biology Microscopy Core for imaging  
727 assistance. This work was supported through NIH grants R21-AI130618 and R21-AI147163  
728 (ACW), R01-AI125416 and R21-AI129851 (SMH and CEM), and R01-AI145266, R01-AI121321,  
729 and R01-CA097093 (MDW). SMH was supported by the Burroughs Wellcome Fund  
730 (17PRE336700170). NSG was supported by an American Heart Association Predoctoral  
731 Fellowship. ABRM was supported by the Natural Sciences and Engineering Research Council  
732 of Canada. Additional support came from the NCI T32 Training Grant in Tumor Virology T32-  
733 CA115299 (AMP) and Individual National Research Service Award F32-AI138432 (AMP).

734

735

## 736 **Data Availability**

737 Basecalled fast5 (Nanopore) and fastq (Illumina) datasets generated as part of this study  
738 can be downloaded from the European Nucleotide Archive (ENA) under the following study  
739 accession: PRJEB35652. The authors declare that all other data supporting the findings of this  
740 study are available within the article and its Supplementary Information files, or are available  
741 from the authors upon request.

742

743

## 744 **Author Contributions**

745 A.M.P., D.P.D., and M.D.W. conceived of the project and designed the experiments; C.E.M.,  
746 A.C.W. and S.M.H. provided additional input into study design; A.M.P., N.S.G., A.N.D.F, and  
747 D.P.D. performed the experiments; D.P.D. designed the nanopore m<sup>6</sup>A detection approach;  
748 K.E.H., A.B.R.M., and D.P.D. performed computational analyses; A.M.P. and D.P.D analyzed all  
749 additional data; A.M.P., D.P.D., and M.D.W. wrote the manuscript; All authors read, edited and  
750 approved the final paper.

751

752 Figures

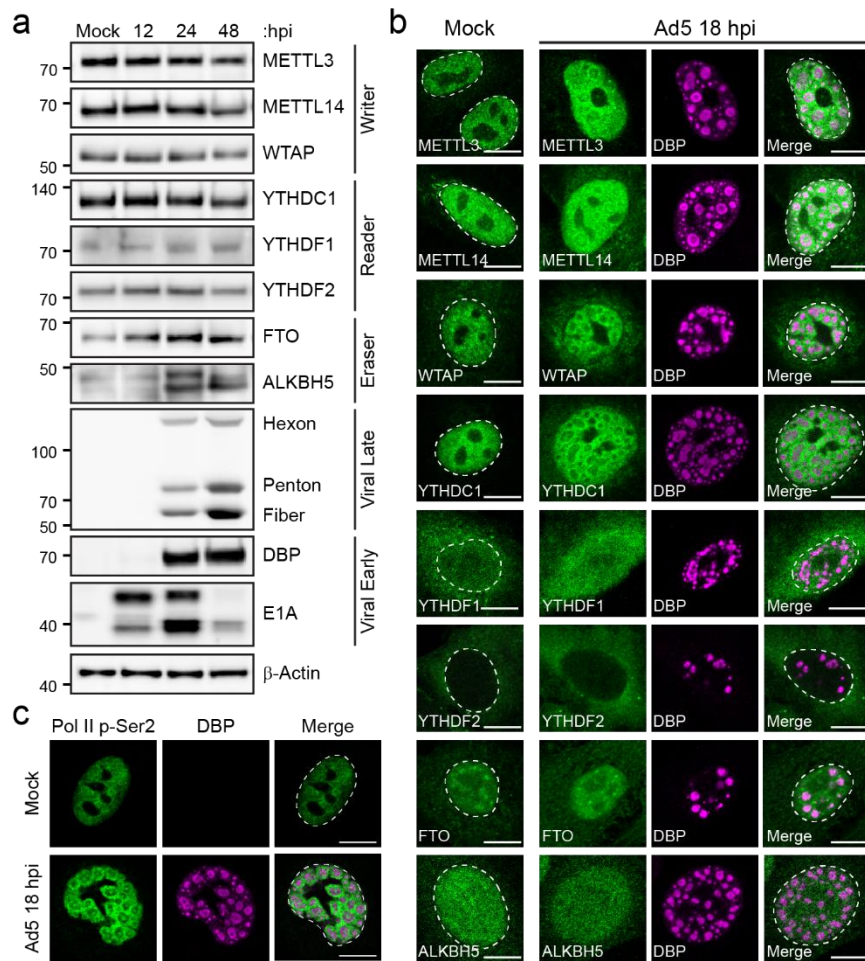

753

754 **Figure 1. Nuclear m<sup>6</sup>A-interacting factors concentrate at sites of nascent viral RNA**  
 755 **synthesis. (a)** Abundance of cellular m<sup>6</sup>A proteins is unchanged during infection. Immunoblot  
 756 showing abundance of m<sup>6</sup>A writers, readers, and putative erasers over a time-course of  
 757 adenovirus infection. Viral early (E1A and DBP) and late (Hexon, Penton, and Fiber) proteins  
 758 demonstrate representative kinetic classes.  $\beta$ -Actin is the loading control. Kilodalton size  
 759 markers shown on the left. **(b)** Confocal microscopy of m<sup>6</sup>A-interacting proteins (green) in mock-  
 760 infected or Ad5-infected A549 cells 18 hours post-infection (hpi). DBP (magenta) is the viral  
 761 DNA binding protein that marks sites of nuclear viral replication centers. The nuclear periphery  
 762 is shown by a dotted white line as assessed by DAPI staining. Scale bar = 10  $\mu$ m. **(c)** Confocal  
 763 microscopy showing the pattern of actively transcribing RNA Polymerase II phosphorylated on  
 764 serine 2 of CTD (Pol II p-Ser2, green) in mock-infected cells or relative to DBP (magenta) in  
 765 infected cells. Scale bar = 10  $\mu$ m.

766

767

768



769

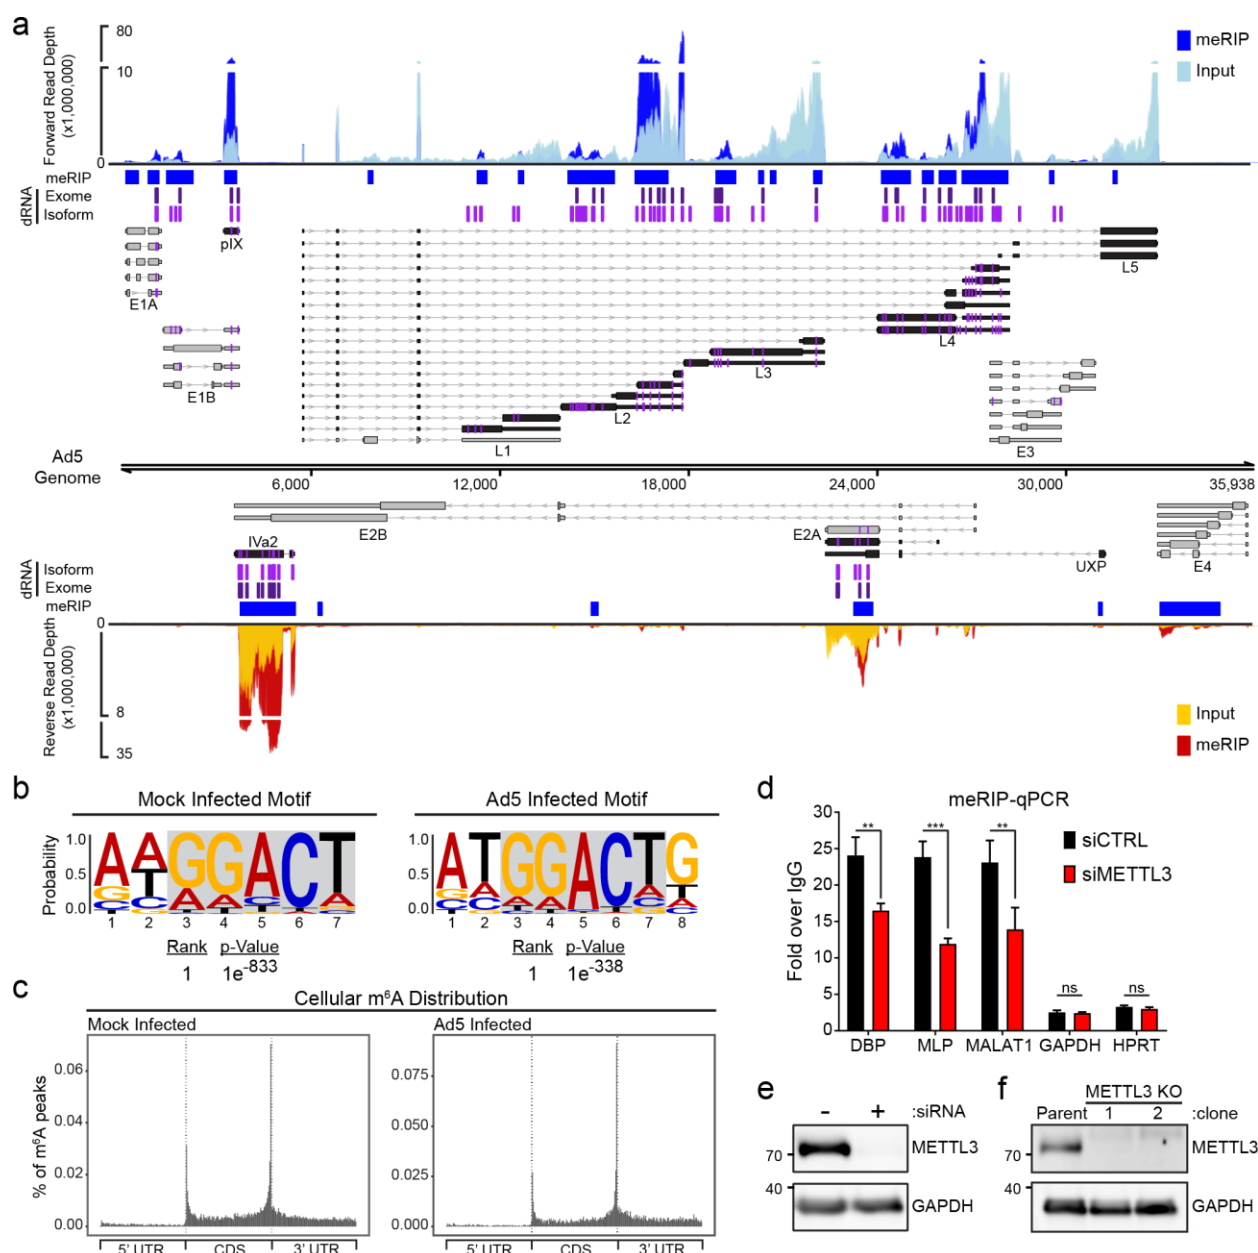

770

771 **Figure 2. Transcript-specific analysis reveals adenovirus RNAs contain METTL3-**  
 772 **dependent m<sup>6</sup>A modifications. (a)** The viral transcriptome is schematized with forward facing  
 773 transcripts above the genome and reverse transcripts below. Viral gene kinetic classes are  
 774 color-coded to denote early (grey) or late (black) genes. Lines with arrows denote introns, thin  
 775 bars are untranslated exonic regions, and thick bars represent open reading frames. The names  
 776 of each viral transcriptional unit are shown below the transcript cluster. meRIP-Seq was  
 777 performed in triplicate on Ad5-infected A549 cells at 24 hpi. Representative meRIP data  
 778 (blue/red) and total input RNA (light blue/yellow) sequence coverage is plotted against the  
 779 adenovirus genome. Peaks containing increased meRIP-seq signal over input were called with  
 780 MACS2 and denoted by blue boxes. Using direct RNA (dRNA) sequencing, full-length RNAs

781 were sequenced from A549 parental cells or METTL3 knockout cells infected with adenovirus  
782 for 24 hours. Specific m<sup>6</sup>A sites were predicted by comparing the nucleotide error rate of dRNA  
783 sequence data from WT to KO cells. Indicated in purple vertical lines are individual adenosines  
784 predicted to be modified by m<sup>6</sup>A that reach statistical significance when applied to all RNA that  
785 maps to a single nucleotide of the Ad genome (dRNA Exome). All Ad5-mapping transcripts were  
786 binned into unique full-length reads spanning entire transcript isoform and the same m<sup>6</sup>A  
787 prediction was applied on a transcript-by-transcript basis. Magenta vertical lines indicate  
788 predicted m<sup>6</sup>A residues found on the transcriptome level (dRNA Isoform). Additionally, the  
789 position of m<sup>6</sup>A present in each viral transcript is highlighted in magenta directly on the transcript  
790 schemes. **(b)** HOMER nucleotide motif analysis of MACS2 called peaks in cellular meRIP-seq  
791 data from Mock or Ad5-infected samples. **(c)** Metagene analysis of m<sup>6</sup>A-peak distribution across  
792 cellular mRNA molecules containing 5' and 3' untranslated regions (UTR) and coding sequence  
793 (CDS) in Mock or Ad5-infected samples. **(d)** meRIP-qRT-PCR was performed on total RNA  
794 isolated from Ad5-infected control or METTL3 knockdown A549 cells 24 hours post-infection. **(e)**  
795 Immunoblot showing knockdown efficiency of METTL3 in A549 cells. **(f)** Representative  
796 immunoblot showing two clones generated from Cas9-mediated knockout of METTL3 in A549  
797 cells. For all assays, significance was determined by Student's T-test, \*\* p≤0.01, \*\*\* p≤0.001,  
798 ns=not significant. Experiments are representative of three biological replicates and error bars  
799 represent standard deviation.

800

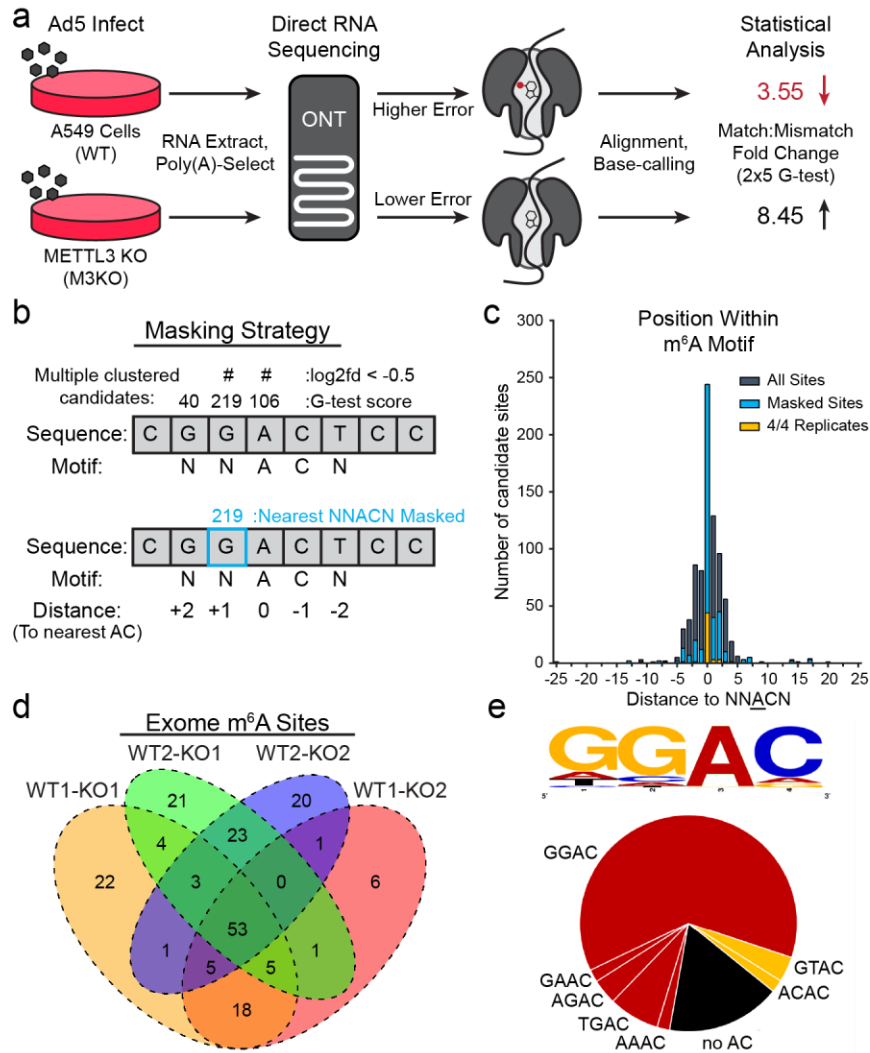

801

802 **Figure 3. A statistical framework for m<sup>6</sup>A detection using direct RNA sequencing.** (a)  
 803 Schematic diagram of proposed strategy to detect m<sup>6</sup>A sites using direct RNA sequencing.  
 804 RNAs generated in WT cells (METTL3 positive) will contain m<sup>6</sup>A modifications, while RNA from  
 805 METTL3 KO cells (M3KO) will not. As modified RNA passes through the pore there will be a  
 806 higher error rate during base-calling compared to unmodified RNA. When compared to the  
 807 reference transcriptome, the aggregate fold change in the Match:Mismatch ratio will be lower in  
 808 at nucleotides containing m<sup>6</sup>A. (b) Proposed strategy for masking neighboring candidates. Here,  
 809 three sites within five nucleotides of an AC produce significant G-test scores. All but the  
 810 candidate giving the highest G-test statistic are masked. (c) For each significant candidate site  
 811 with a one-fold or greater difference in the match:mismatch ratio, the distance to the nearest AC  
 812 motif was calculated and plotted (grey). This was repeated after masking neighboring  
 813 candidates (blue) and for the 53 genome-level sites identified across all four comparisons  
 814 (gold). (d) Comparisons between WT and M3KO (KO) datasets yields 184 putative m<sup>6</sup>A  
 815 modified bases (post-masking) of which 53 are consistently detected across all four  
 816 comparisons. (e) The consensus four-nucleotide motif (DRACH) for putative m<sup>6</sup>A modified bases  
 817 in the Ad5 transcriptome is predominantly comprised of five common DRACH motifs.

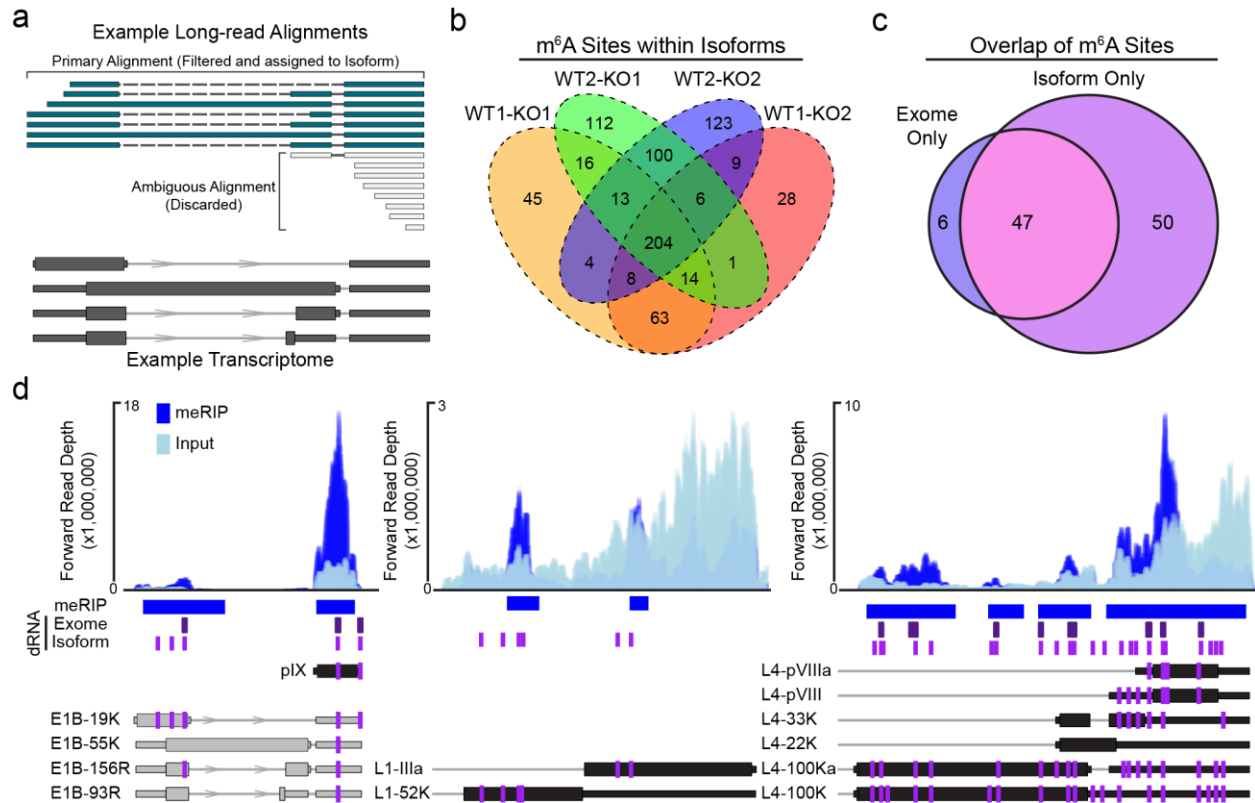

818

819 **Figure 4. Exome versus isoform-level m<sup>6</sup>A analysis.** (a) Example of read filtering.  
 820 Overlapping RNA isoforms are shown in dark grey. Sequence reads that map unambiguously  
 821 (teal) are filtered and retained for m<sup>6</sup>A analysis. Sequence reads with multiple primary  
 822 alignments (grey) are discarded if no single alignment is considered superior. (b) Isoform-level  
 823 comparisons between WT and M3KO datasets yields 747 candidates (post-masking) of which  
 824 204 are consistently detected across all four comparisons. (c) Overlap of all m<sup>6</sup>A sites detected  
 825 in 4/4 exome-mapped replicates and 4/4 isoform-mapped replicates. Isoform only candidates  
 826 were collapsed to unique genomic loci. (d) Representative plots showing isoform-specific m<sup>6</sup>A  
 827 predictions on adenovirus transcripts. MACS2 peaks and meRIP-seq signal (blue) is shown on  
 828 top. Direct RNA (dRNA) predicted m<sup>6</sup>A sites at the exome-level (purple) or isoform-level  
 829 (magenta) are shown below meRIP peaks as vertical lines. The positioning of m<sup>6</sup>A within  
 830 individual viral transcripts from Figure 2 are shown as magenta lines. Transcript names are  
 831 shown to the left of each transcript.

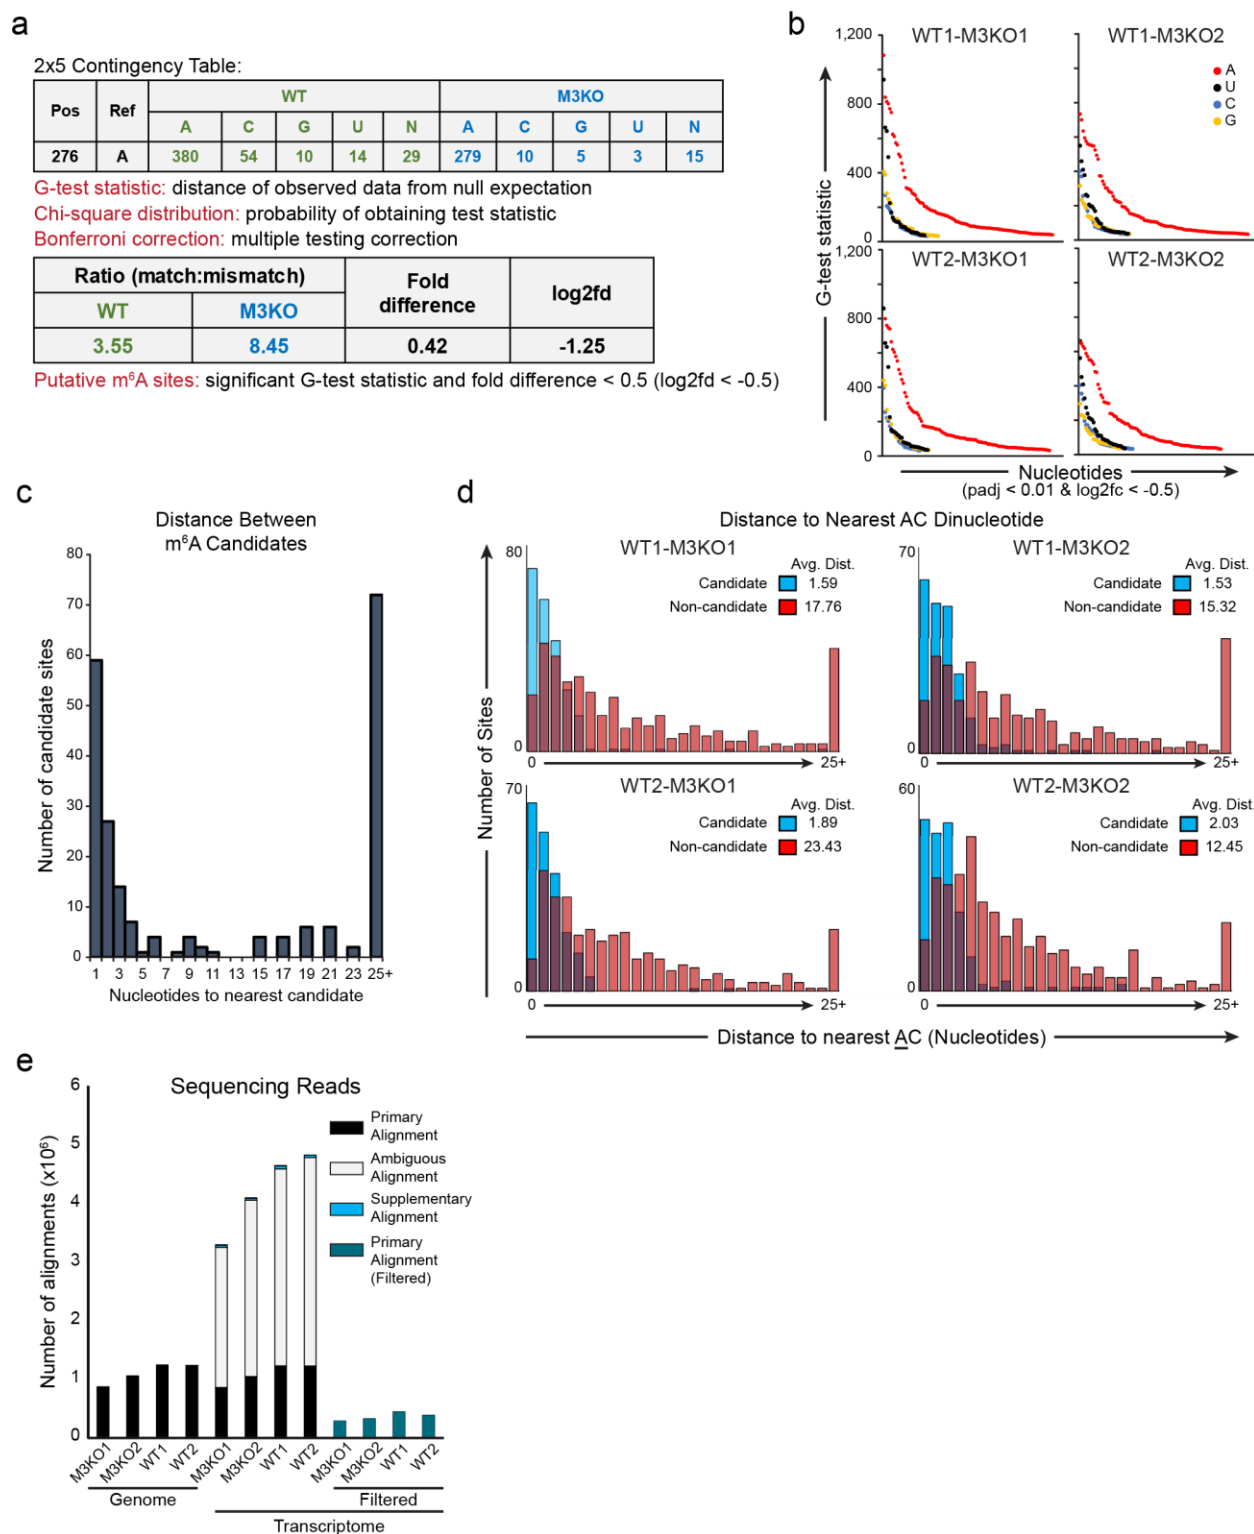

832

833 **Supp Figure 1. Direct RNA m<sup>6</sup>A prediction clusters on AC dinucleotides. (a)** Example 2x5  
 834 contingency table and statistical tests used to predict m<sup>6</sup>A sites at nucleotide resolution by  
 835 comparing the error rate between RNA generated in WT (METTL3-positive) versus METTL3  
 836 Knockout (M3KO) cells. **(b)** Distributions of the significant G-test statistic for each nucleotide

837 with additional filtering for a one-fold or greater difference in the match:mismatch ratio between  
838 the m<sup>6</sup>A positive (WT) and m<sup>6</sup>A negative (M3KO) datasets. All G-test statistic p-values are  
839 corrected for multiple comparisons using Bonferroni correction. **(c)** The distance (in nucleotides)  
840 between nearest neighbor candidates indicates that multiple candidate sites (significant G-test  
841 statistics) lie proximal to many putative m<sup>6</sup>A modified bases. **(d)** Distance to the nearest A  
842 nucleotide in an AC dinucleotide within the Ad5 genome for candidate m<sup>6</sup>A sites (blue) versus  
843 200 randomly selected non-candidate sites (red). Average distance for the four distinct  
844 comparisons are shown in the legend. **(e)** Alignment of sequence reads to the adenovirus  
845 genome results in a single primary alignment per read (SAM flag 0). By comparison, aligning  
846 against the transcriptome can yield multiple primary alignments (termed secondary alignments,  
847 SAM flag 256, grey) and/or supplementary alignments (SAM flag 2048, blue). Subsequent  
848 filtering to retain only reads that unambiguously align to a single transcript (SAM flag 0, mapping  
849 quality >0, teal) results in approximately 70% of the sequence datasets being discarded.

850

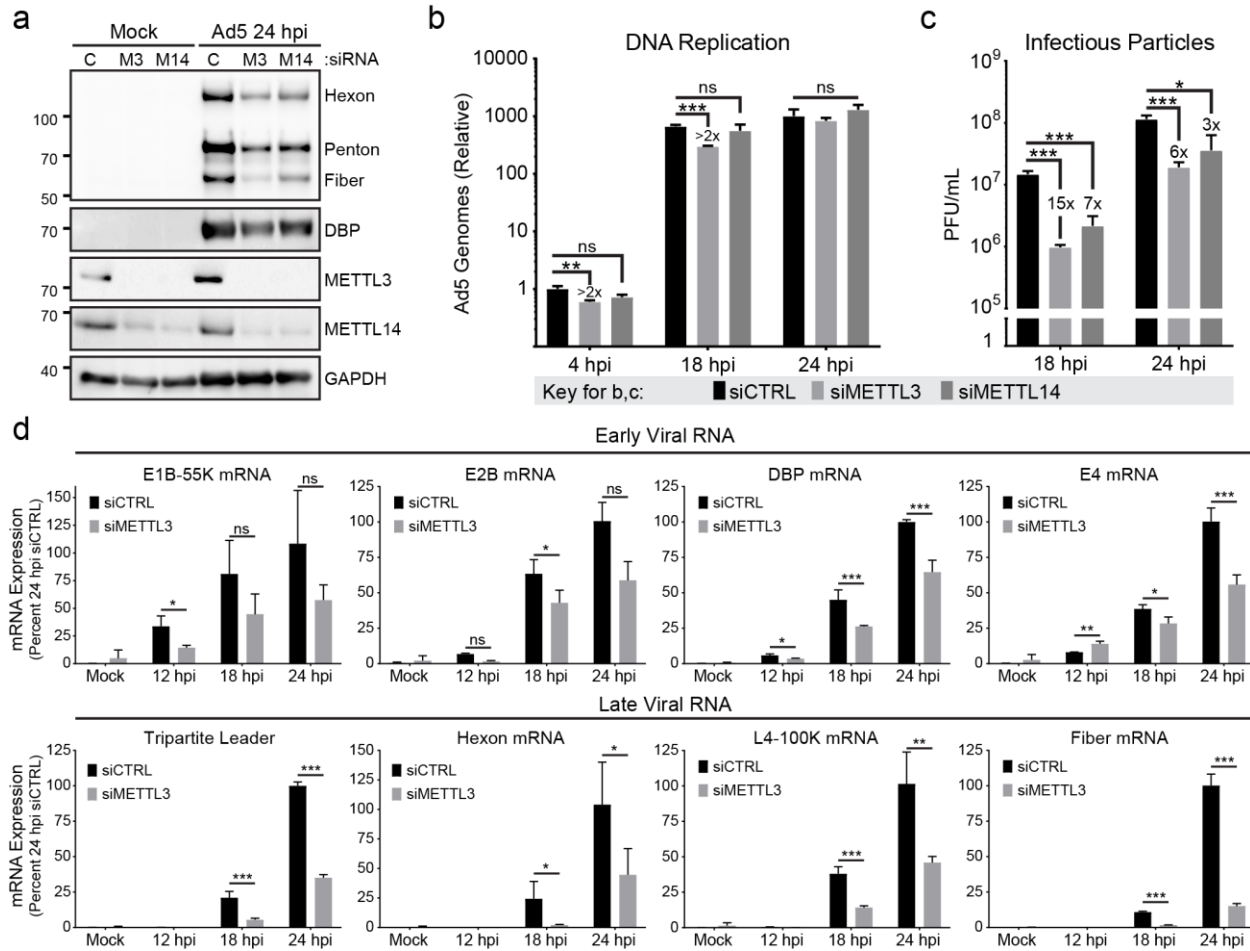

851

852 **Figure 5. Loss of METTL3 differentially impacts late viral gene expression.** (a) A549 cells  
 853 were transfected with control siRNA (C), or siRNA targeting METTL3 (M3) or METTL14  
 854 for 48 hours before Ad5 infection. Viral late proteins were analyzed at 24 hpi with polyclonal  
 855 antibody against structural proteins (Hexon, Penton, and Fiber) or early protein DBP. (b)  
 856 Viral DNA replication was measured in biological triplicate samples with qPCR at different times  
 857 after infecting A549 cells depleted of METTL3 or METTL14 by siRNA. Fold-change in genome copy  
 858 was normalized to the amount of input DNA at 4 hpi in control siRNA treated cells. (c)  
 859 Infectious particle production was measured at different times by plaque assay after infecting A549 cells  
 860 depleted of METTL3 or METTL14 by siRNA. (d) Viral RNA expression was measured by qRT-  
 861 PCR in a time-course of infection after control or METTL3 knockdown for 48 hours. Viral early  
 862 transcripts are shown on the top, while late stage transcripts are shown on the bottom. For all  
 863 assays significance was determined by Student's T-test, \*  $p \leq 0.05$ , \*\*  $p \leq 0.01$ , \*\*\*  $p \leq 0.001$ ,  
 864 ns=not significant. Experiments are representative of three biological replicates and error bars  
 865 represent standard deviation.

866

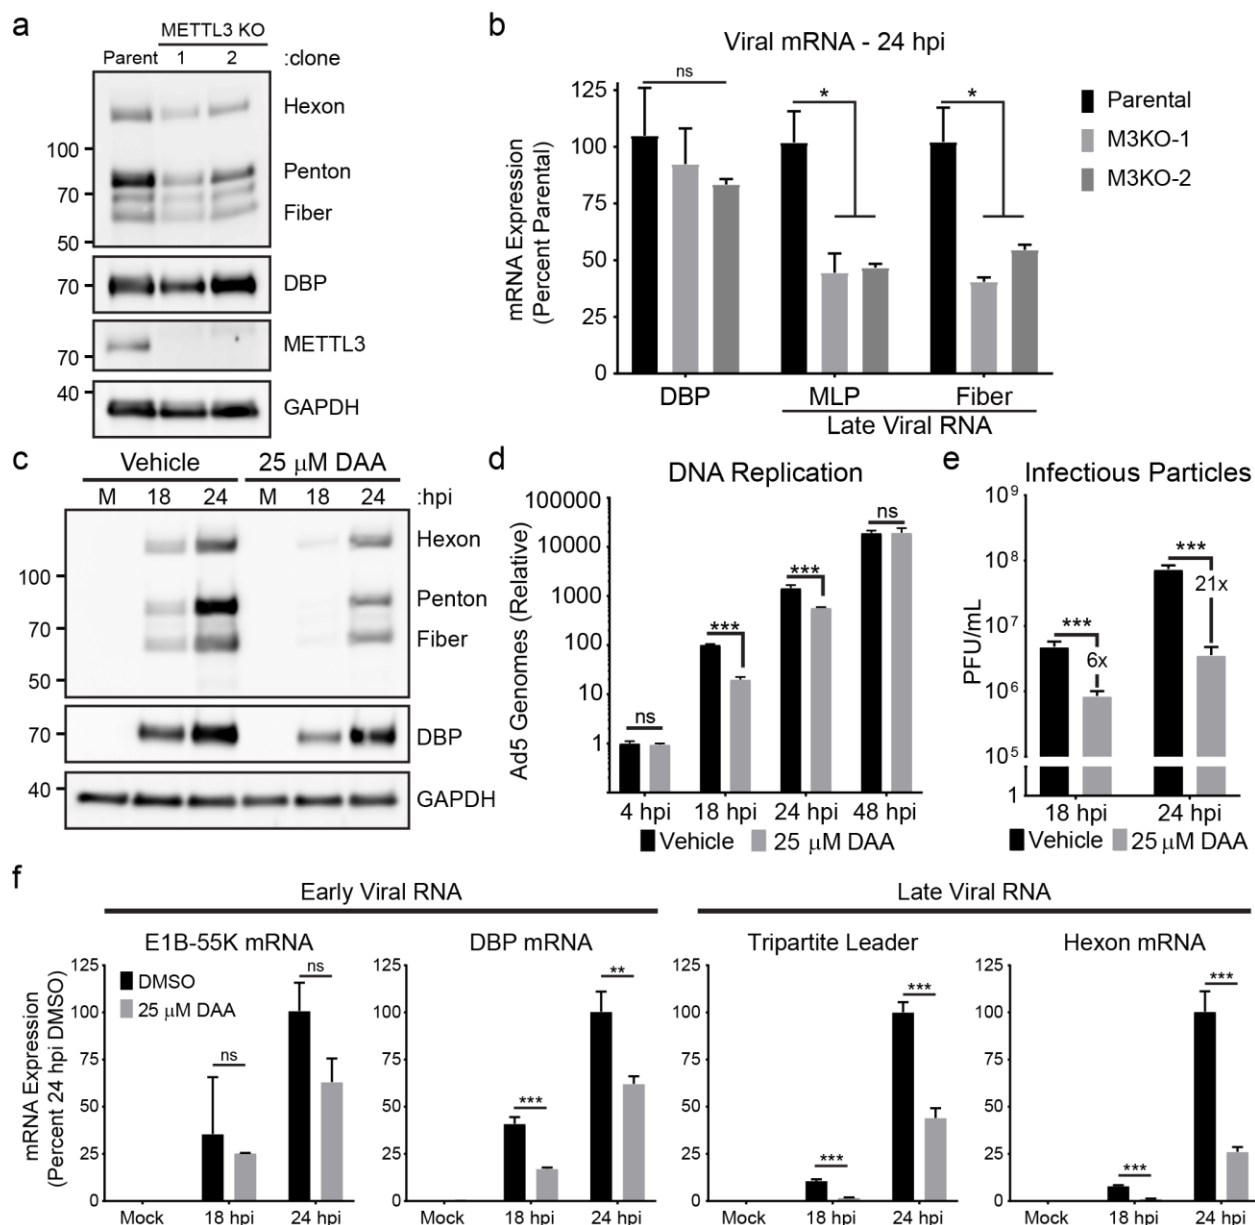

867

868 **Supp Figure 2. METTL3 knockdown is phenocopied by methylation inhibition or METTL3**  
 869 **knockout. (a)** Two independent clones of Cas9-generated METTL3 knockout cells (M3KO) or  
 870 the parental A549 cells were infected with Ad5 for 24 hours and analyzed for early protein  
 871 expression (DBP) or late proteins (Hexon, Penton, and Fiber) by immunoblot. **(b)** Viral early and  
 872 late RNA expression was measured by qRT-PCR at 24 hpi with Ad5. Samples include three cell  
 873 culture triplicates of A549 Parental or M3KO clones 1 and 2. **(c)** Viral early and late protein  
 874 expression was analyzed by immunoblot over a time-course of infection in cells treated with 25  
 875  $\mu$ M m<sup>6</sup>A-inhibitor 3-Deazaadenosine (DAA) or vehicle control. **(d)** Viral DNA replication was  
 876 measured with qPCR in biological triplicate samples at different times after infecting A549 cells  
 877 and concurrently treating with vehicle or 25  $\mu$ M DAA. Fold-change in genome copy was  
 878 normalized to the amount of input DNA at 4 hpi in vehicle treated cells. **(e)** Infectious particle  
 879 production was measured by plaque assay at different times after infecting A549 cells and



880 concurrently treating with vehicle or 25  $\mu$ M DAA. **(f)** Viral RNA expression was measured by  
 881 qRT-PCR in a time-course of infection after concurrently treating with vehicle or 25  $\mu$ M DAA.  
 882 Viral early transcripts are shown on the left, while late stage transcripts are shown on the right.  
 883 Data include three biological replicates and significance was determined by Student's T-test, \*  
 884  $p \leq 0.05$ , \*\*  $p \leq 0.01$ , \*\*\*  $p \leq 0.001$ , ns=not significant. Experiments are representative of three  
 885 biological replicates and error bars represent standard deviation.

886

887

888

889

890

891

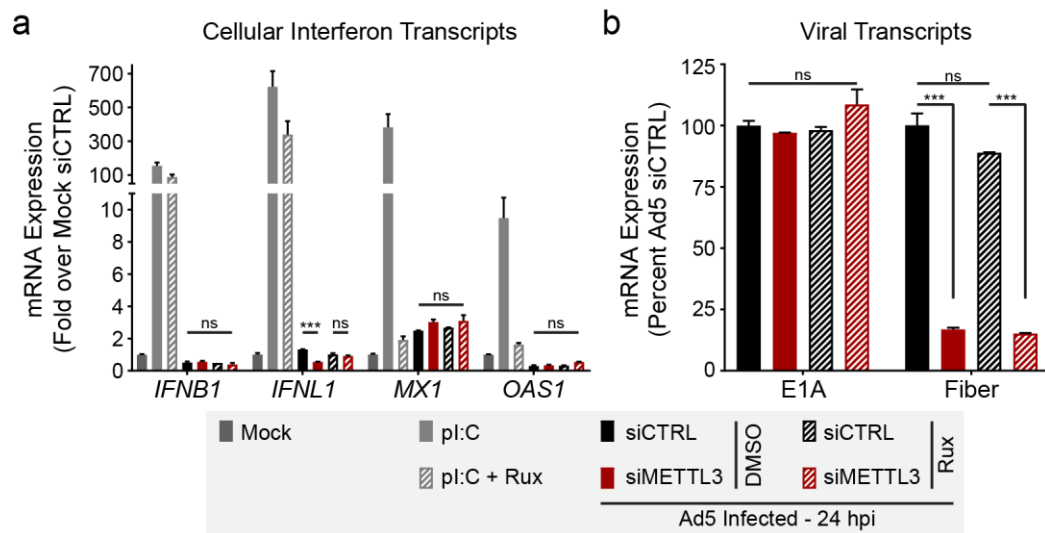

892

893 **Figure 6. Interferon gene expression is not induced by METTL3 knockdown or**  
 894 **adenovirus infection. (a)** A549 cells were mock treated (dark grey bars) or transfected with the  
 895 viral RNA agonist poly(I:C) for 24 hours (light grey bars). Concurrently, A549 cells were  
 896 depleted of METTL3 with siRNA (red bars) or control treated with siRNA (black bars) before  
 897 being infected with Ad5 for 24 hours. All sample were either treated with 4  $\mu$ M Ruxolitinub  
 898 (hashed bars) or vehicle control (solid bars) for the duration of infection or poly(I:C)  
 899 transduction. Interferon RNAs were measured by qRT-PCR and displayed as fold-change over  
 900 mock treated A549 cells. **(b)** Viral transcripts were quantified by qRT-PCR to assay expression  
 901 of a viral early gene (E1A) or a viral late gene (Fiber). For all assays, significance was  
 902 determined by Student's T-test, \*\*\*  $p \leq 0.001$ , ns=not significant.

903

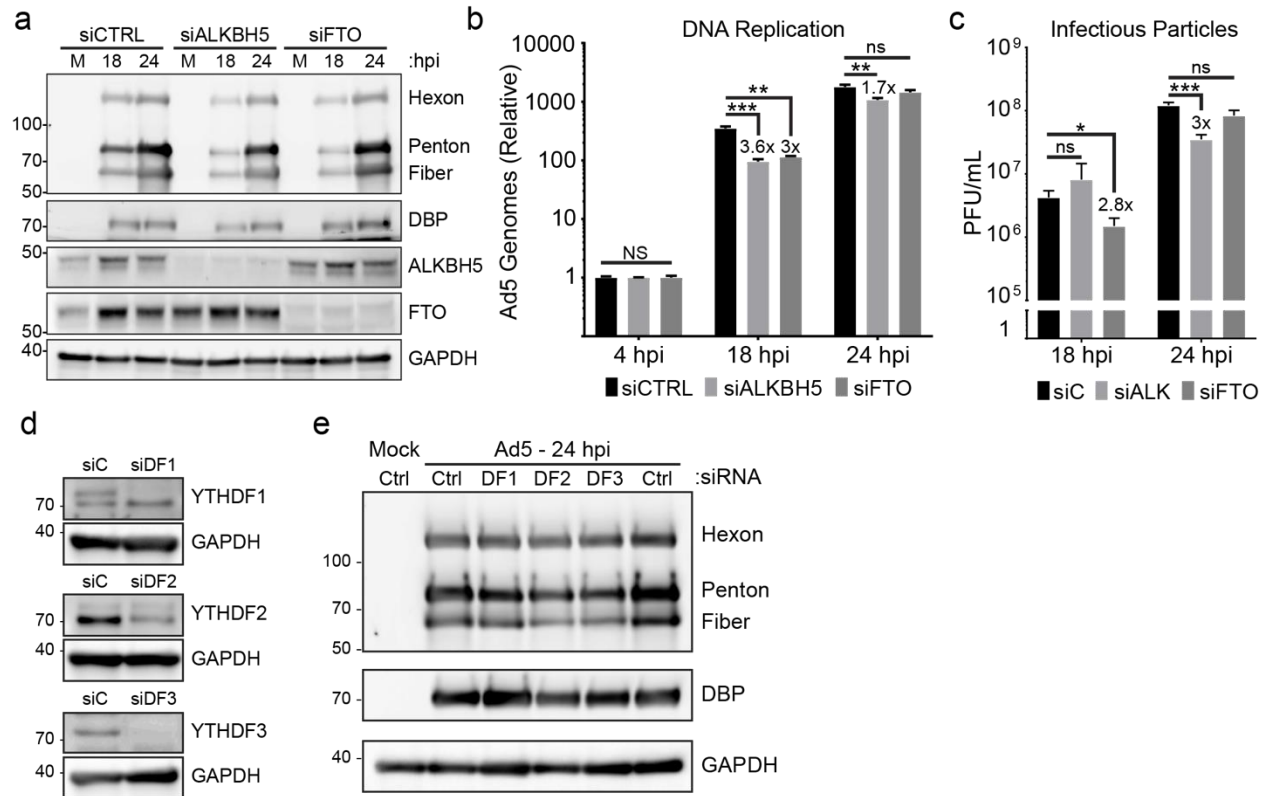

904

905 **Supp Figure 3. Cytoplasmic readers and m<sup>6</sup>A-erasers have minimal effects on the**  
 906 **adenoviral infectious cycle. (a)** A549 cells were transfected with control siRNA (CTRL), or  
 907 siRNA targeting ALKBH5 or FTO for 48 hours before Ad5 infection. Viral late proteins were  
 908 analyzed over a time-course of infection with polyclonal antibody against structural genes  
 909 (Hexon, Penton, and Fiber) or the early protein DBP. **(b)** Viral DNA replication was measured in  
 910 biological triplicate samples with qPCR over a time-course of infection in A549 cells depleted of  
 911 ALKBH5 or FTO by siRNA. Fold-change in genome copy was normalized to the amount of input  
 912 DNA at 4 hpi in control siRNA treated cells. **(c)** Infectious particle production was measured by  
 913 plaque assay at different times post-infection after infecting A549 cells depleted of ALKBH5 or  
 914 FTO by siRNA. Data includes three biological replicates. **(d)** siRNA-mediated knockdown of  
 915 YTHDF1, YTHDF2, or YTHDF3 in A549 cells. **(e)** A549 cells were transfected with control  
 916 siRNA (Ctrl), or siRNA targeting YTHDF1, -2, or -3 (DF1, DF2, DF3) for 48 hours prior to Ad5  
 917 infection. Viral early and late proteins were analyzed by immunoblot with the indicated  
 918 antibodies. For all assays, significance was determined by Student's T-test, \* p≤0.05, \*\* p≤0.01,  
 919 \*\*\* p≤0.001, ns=not significant.

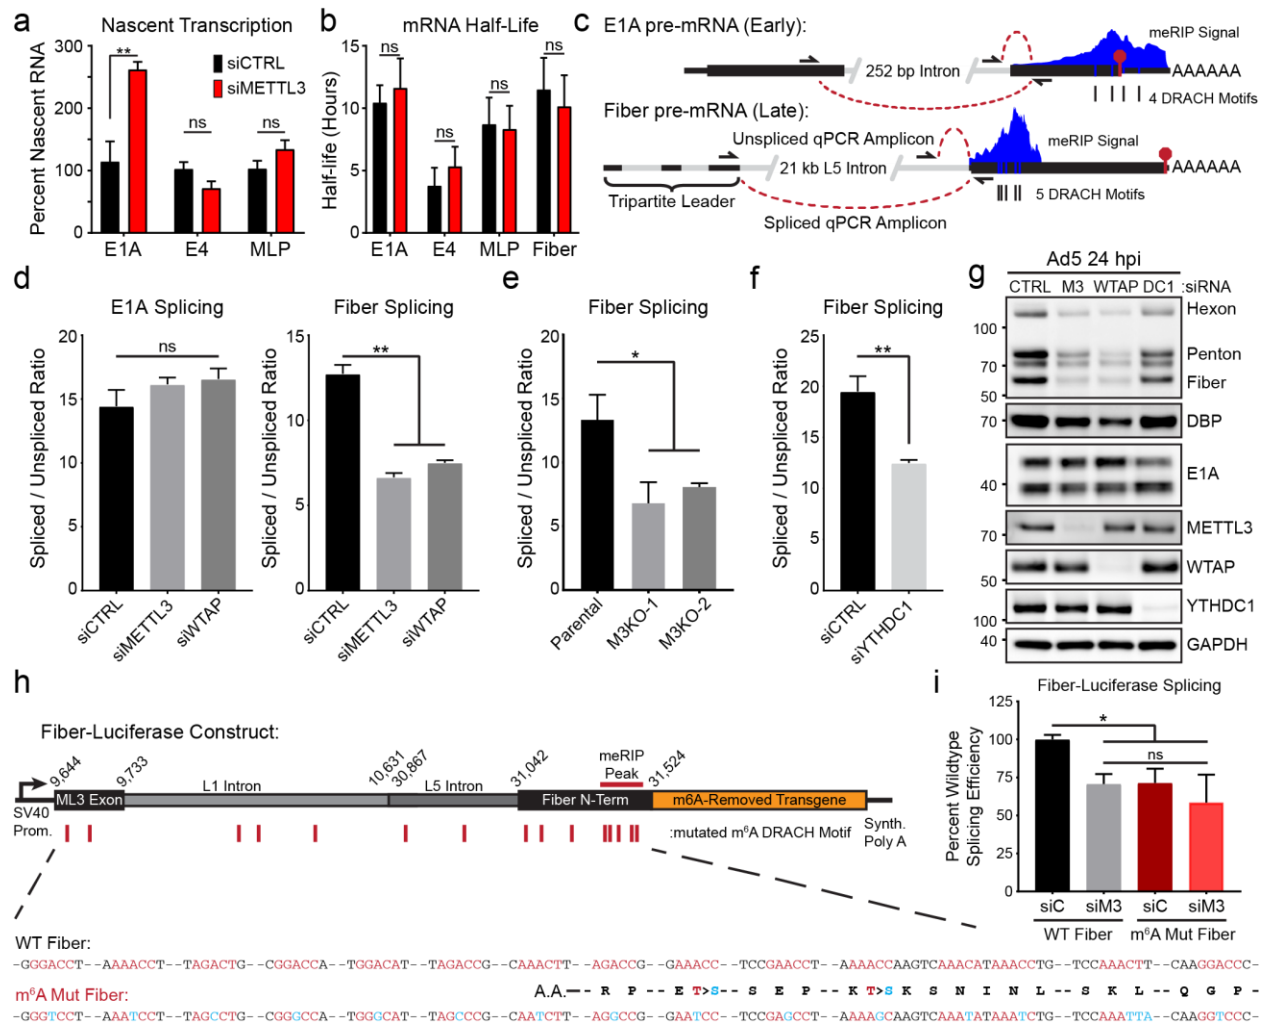

920

921 **Figure 7. Splicing efficiency of late viral RNA is mediated by m<sup>6</sup>A.** (a) Nascent transcription  
 922 was analyzed by labeling RNA with 1 mM 4-thiouridine (4sU) for exactly ten minutes at 24 hpi  
 923 for infections of A549 cells transfected with control (siCTRL) or siRNA-mediated knockdown of  
 924 METTL3 (siMETTL3). Nascent 4sU-labeled RNA was extracted for use in qRT-PCR for analysis  
 925 of relative transcription rates of two viral early genes (E1A and E4) and the tripartite leader  
 926 (MLP) found in all Ad5 late transcripts. Samples include four biological replicates. (b) mRNA  
 927 half-life was approximated using 4sU-labeled nascent RNA and total input RNA levels for viral  
 928 transcripts normalized to GAPDH. Samples include four biological replicates. (c) Schematic of  
 929 the early transcript E1A and the late transcript Fiber that both contain m<sup>6</sup>A sites. Three primers  
 930 allow for the distinction between spliced and unspliced PCR products that can be analyzed by  
 931 qRT-PCR. (d) Splice efficiency as defined by the relative ratio of spliced to unspliced transcripts  
 932 of E1A and Fiber were analyzed by qRT-PCR in A549 cells infected with Ad5 for 24 hours after  
 933 depletion of METTL3 or WTAP. Data represents three biological experiments. (e) Fiber splice  
 934 efficiency was analyzed in Parental A549 cells or two independent METTL3 KO cell lines. (f)  
 935 Splice efficiency of Fiber was analyzed after siRNA-mediated depletion of the nuclear m<sup>6</sup>A  
 936 reader YTHDC1. (g) Immunoblot showing viral late proteins Hexon, Penton, and Fiber as well  
 937 as viral early proteins DBP and E1A. A549 cells were depleted of METTL3 (M3), WTAP,

938 YTHDC1 (DC1) or control siRNA (siC) for 48 hours prior to infection with Ad5 for 24 hours. **(h)**  
939 Schematic design for a luciferase construct that expresses the third adenovirus tripartite leader  
940 to Fiber splice site with intervening L1 and L5 adenoviral intron. The 5' fragment of Fiber that  
941 contains the m<sup>6</sup>A signal peak was fused in-frame to a *Renilla* luciferase transgene where all  
942 m<sup>6</sup>A DRACH motifs have been ablated by silent mutation. A matching construct was generated  
943 with all 15 potential m<sup>6</sup>A DRACH motifs ablated by silent or synonymous mutation (m<sup>6</sup>A Mut  
944 Fiber). **(i)** HeLa cells were control transfected (siC) or depleted of METTL3 (siM3) by siRNA for  
945 48 hours before transfection with either WT Fiber or m<sup>6</sup>A Mut Fiber plasmid. At 24 hours after  
946 the second transfection, splicing efficiency of the transgene was assayed using Fiber-specific  
947 primers. Data represent four biological replicates. For all assays significance was determined by  
948 Student's T-test, \* p≤0.05, \*\* p≤0.01, ns=not significant. Error bars represent standard deviation.

949

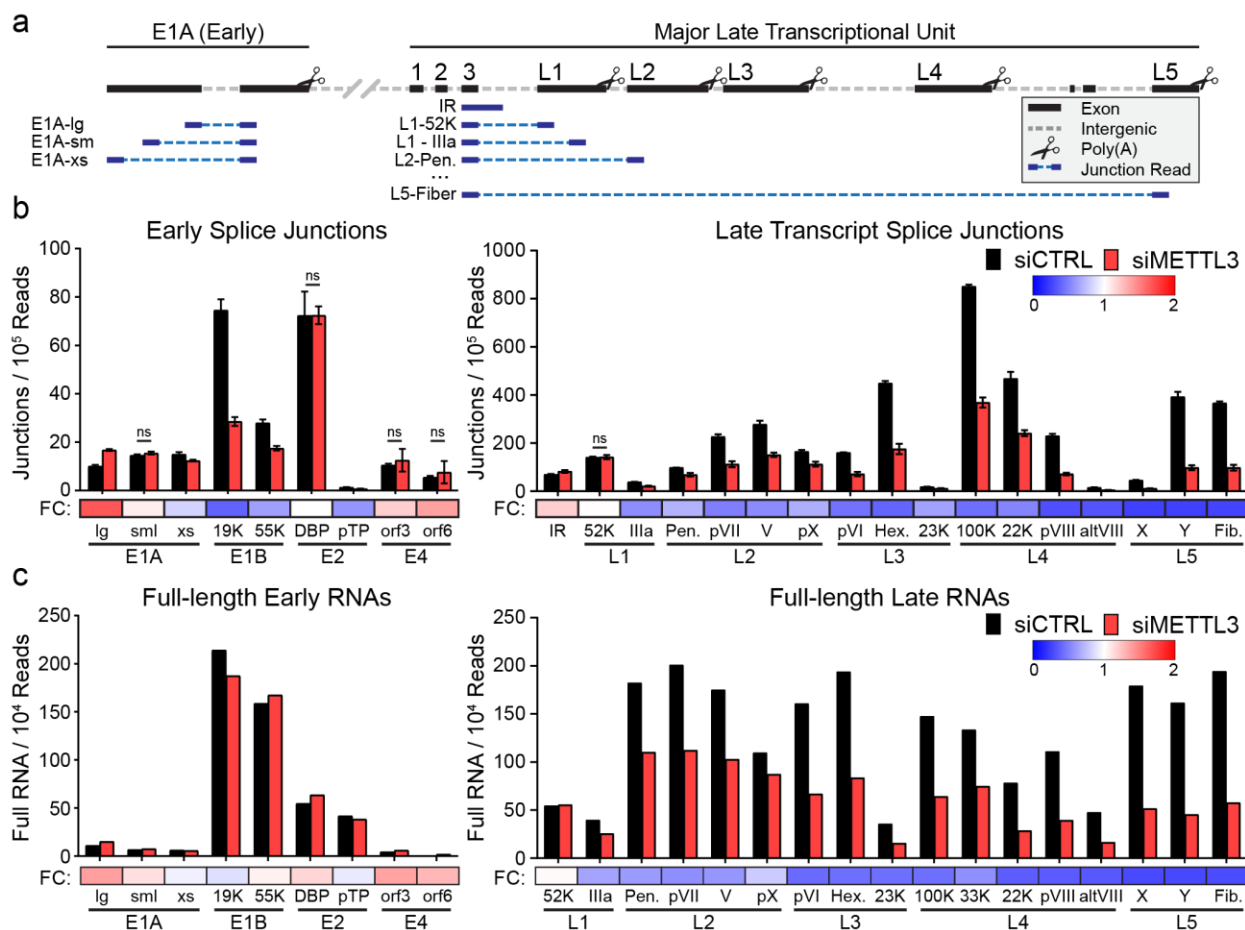

950

951 **Figure 8. METTL3 knockdown globally dysregulates adenoviral late RNA processing. (a)**

952 Schematic showing how junction-containing splice reads generated by Illumina sequencing can  
 953 be used to predict specific transcript abundances when genes overlap. Short reads (dark blue)  
 954 aligning specifically to viral exons (black) were filtered for the presence of a splice junction  
 955 (dashed light blue line) that was only present in one viral transcript. **(b)** Splice junction  
 956 containing reads indicative of adenovirus transcripts present in Illumina RNA-Seq data  
 957 generated after infection of A549 cells where METTL3 was depleted by siRNA. Splice junction  
 958 read-depth was normalized to the total amount of reads mapping to both human and viral RNA  
 959 per library. Early viral transcripts are shown on the left, MLP-derived late transcripts shown on  
 960 the right. Fold-change (FC) between control siRNA and siMETTL3 for each transcript was  
 961 plotted as a heatmap below the bar chart. Data depict three biological replicates with error bars  
 962 showing standard deviation. For all assays significance was determined by Student's T-test,  
 963 everything un-labeled was significant with  $p \leq 0.05$ . Otherwise specific comparisons were labeled  
 964 ns (not significant). **(c)** Independently derived RNA was sequenced by ONT after METTL3  
 965 knockdown and adenovirus infection to yield full-length RNA sequences indicative of the labeled  
 966 early and late viral transcripts. Fold-change (FC) between control siRNA and siMETTL3 for each  
 967 transcript was plotted as a heatmap below the bar chart.

968

969 **References**

- 970 1. Arnold J. Berk. Adenoviridae. in *Fields Virology* (eds. David M. Knipe & Peter M. Howley)  
971 vol. 2 1704–1731 (Wolters Kluwer Health/Lippincott Williams & Wilkins, 2013).
- 972 2. Sommer, S. *et al.* The methylation of adenovirus-specific nuclear and cytoplasmic RNA.  
973 *Nucleic Acids Res* **3**, 749–65 (1976).
- 974 3. Chen-Kiang, S., Nevins, J. R. & Darnell, J. E. N-6-methyl-adenosine in adenovirus type 2  
975 nuclear RNA is conserved in the formation of messenger RNA. *J Mol Biol* **135**, 733–52  
976 (1979).
- 977 4. Zhao, B. S., Roundtree, I. A. & He, C. Post-transcriptional gene regulation by mRNA  
978 modifications. *Nat Rev Mol Cell Biol* **18**, 31–42 (2017).
- 979 5. Williams, G. D., Gokhale, N. S. & Horner, S. M. Regulation of Viral Infection by the RNA  
980 Modification N6-Methyladenosine. *Annu. Rev. Virol.* **6**, 235–253 (2019).
- 981 6. Yue, Y., Liu, J. & He, C. RNA N6-methyladenosine methylation in post-transcriptional gene  
982 expression regulation. *Genes Dev* **29**, 1343–55 (2015).
- 983 7. Xiao, W. *et al.* Nuclear m(6)A Reader YTHDC1 Regulates mRNA Splicing. *Mol Cell* **61**,  
984 507–19 (2016).
- 985 8. Bartosovic, M. *et al.* N6-methyladenosine demethylase FTO targets pre-mRNAs and  
986 regulates alternative splicing and 3'-end processing. *Nucleic Acids Res* **45**, 11356–11370  
987 (2017).
- 988 9. Roundtree, I. A. *et al.* YTHDC1 mediates nuclear export of N(6)-methyladenosine  
989 methylated mRNAs. *Elife* **6**, (2017).
- 990 10. Wang, X. *et al.* N6-methyladenosine-dependent regulation of messenger RNA stability.  
991 *Nature* **505**, 117–20 (2014).
- 992 11. Lin, S., Choe, J., Du, P., Triboulet, R. & Gregory, R. I. The m(6)A Methyltransferase  
993 METTL3 Promotes Translation in Human Cancer Cells. *Mol Cell* **62**, 335–45 (2016).

- 994 12. Wang, X. *et al.* N(6)-methyladenosine Modulates Messenger RNA Translation Efficiency.  
995 *Cell* **161**, 1388–99 (2015).
- 996 13. Liu, J. *et al.* A METTL3-METTL14 complex mediates mammalian nuclear RNA N6-  
997 adenosine methylation. *Nat Chem Biol* **10**, 93–5 (2014).
- 998 14. Schwartz, S. *et al.* Perturbation of m6A writers reveals two distinct classes of mRNA  
999 methylation at internal and 5' sites. *Cell Rep* **8**, 284–96 (2014).
- 1000 15. Ke, S. *et al.* m(6)A mRNA modifications are deposited in nascent pre-mRNA and are not  
1001 required for splicing but do specify cytoplasmic turnover. *Genes Dev* **31**, 990–1006 (2017).
- 1002 16. Meyer, K. D. & Jaffrey, S. R. Rethinking m(6)A Readers, Writers, and Erasers. *Annu Rev*  
1003 *Cell Dev Biol* **33**, 319–342 (2017).
- 1004 17. Hazra, D., Chapat, C. & Graille, M. m6A mRNA Destiny: Chained to the rhYTHm by the  
1005 YTH-Containing Proteins. *Genes* **10**, 49 (2019).
- 1006 18. Liu, N. *et al.* N(6)-methyladenosine-dependent RNA structural switches regulate RNA-  
1007 protein interactions. *Nature* **518**, 560–564 (2015).
- 1008 19. Zhou, K. I. *et al.* Regulation of Co-transcriptional Pre-mRNA Splicing by m6A through the  
1009 Low-Complexity Protein hnRNPG. *Mol. Cell* **76**, 70-81.e9 (2019).
- 1010 20. Huang, H. *et al.* Recognition of RNA N(6)-methyladenosine by IGF2BP proteins enhances  
1011 mRNA stability and translation. *Nat Cell Biol* **20**, 285–295 (2018).
- 1012 21. Zheng, G. *et al.* ALKBH5 is a mammalian RNA demethylase that impacts RNA metabolism  
1013 and mouse fertility. *Mol Cell* **49**, 18–29 (2013).
- 1014 22. Mauer, J. *et al.* Reversible methylation of m 6 A m in the 5' cap controls mRNA stability.  
1015 *Nature* **541**, 371–375 (2017).
- 1016 23. Kane, S. E. & Beemon, K. Precise localization of m6A in Rous sarcoma virus RNA reveals  
1017 clustering of methylation sites: implications for RNA processing. *Mol. Cell. Biol.* **5**, 2298–  
1018 2306 (1985).

- 1019 24. Lavi, S. & Shatkin, A. J. Methylated simian virus 40-specific RNA from nuclei and  
1020 cytoplasm of infected BSC-1 cells. *Proc Natl Acad Sci U S A* **72**, 2012–6 (1975).
- 1021 25. Moss, B., Gershowitz, A., Stringer, J. R., Holland, L. E. & Wagner, E. K. 5'-Terminal and  
1022 internal methylated nucleosides in herpes simplex virus type 1 mRNA. *J Virol* **23**, 234–9  
1023 (1977).
- 1024 26. Krug, R. M., Morgan, M. A. & Shatkin, A. J. Influenza viral mRNA contains internal N6-  
1025 methyladenosine and 5'-terminal 7-methylguanosine in cap structures. *J Virol* **20**, 45–53  
1026 (1976).
- 1027 27. Kennedy, E. M. *et al.* Posttranscriptional m(6)A Editing of HIV-1 mRNAs Enhances Viral  
1028 Gene Expression. *Cell Host Microbe* **19**, 675–85 (2016).
- 1029 28. Lichinchi, G. *et al.* Dynamics of the human and viral m(6)A RNA methylomes during HIV-1  
1030 infection of T cells. *Nat Microbiol* **1**, 16011 (2016).
- 1031 29. Tirumuru, N. *et al.* N(6)-methyladenosine of HIV-1 RNA regulates viral infection and HIV-1  
1032 Gag protein expression. *Elife* **5**, (2016).
- 1033 30. Courtney, D. G. *et al.* Epitranscriptomic Enhancement of Influenza A Virus Gene  
1034 Expression and Replication. *Cell Host Microbe* **22**, 377-386 e5 (2017).
- 1035 31. Hao, H. *et al.* N6-methyladenosine modification and METTL3 modulate enterovirus 71  
1036 replication. *Nucleic Acids Res.* **47**, 362–374 (2019).
- 1037 32. Gokhale, N. S. *et al.* N6-Methyladenosine in Flaviviridae Viral RNA Genomes Regulates  
1038 Infection. *Cell Host Microbe* **20**, 654–665 (2016).
- 1039 33. Lichinchi, G. *et al.* Dynamics of Human and Viral RNA Methylation during Zika Virus  
1040 Infection. *Cell Host Microbe* **20**, 666–673 (2016).
- 1041 34. Gokhale, N. S. *et al.* Altered m6A Modification of Specific Cellular Transcripts Affects  
1042 Flaviviridae Infection. *Mol. Cell* (2019) doi:10.1016/j.molcel.2019.11.007.
- 1043 35. Imam, H. *et al.* N6-methyladenosine modification of hepatitis B virus RNA differentially  
1044 regulates the viral life cycle. *Proc. Natl. Acad. Sci. U. S. A.* **115**, 8829–8834 (2018).



- 1045 36. Tsai, K., Courtney, D. G. & Cullen, B. R. Addition of m6A to SV40 late mRNAs enhances  
1046 viral structural gene expression and replication. *PLoS Pathog.* **14**, e1006919 (2018).
- 1047 37. Ye, F., Chen, E. R. & Nilsen, T. W. Kaposi's Sarcoma-Associated Herpesvirus Utilizes and  
1048 Manipulates RNA N6-Adenosine Methylation to Promote Lytic Replication. *J Virol* (2017)  
1049 doi:10.1128/JVI.00466-17.
- 1050 38. Tan, B. *et al.* Viral and cellular N 6 -methyladenosine and N 6 ,2'- O -dimethyladenosine  
1051 epitranscriptomes in the KSHV life cycle. *Nat. Microbiol.* **3**, 108–120 (2018).
- 1052 39. Hesser, C. R., Karijolich, J., Dominissini, D., He, C. & Glaunsinger, B. A. N6-  
1053 methyladenosine modification and the YTHDF2 reader protein play cell type specific roles  
1054 in lytic viral gene expression during Kaposi's sarcoma-associated herpesvirus infection.  
1055 *PLoS Pathog.* **14**, e1006995 (2018).
- 1056 40. Rubio, R. M., Depledge, D. P., Bianco, C., Thompson, L. & Mohr, I. RNA m6 A modification  
1057 enzymes shape innate responses to DNA by regulating interferon  $\beta$ . *Genes Dev.* **32**, 1472–  
1058 1484 (2018).
- 1059 41. Winkler, R. *et al.* m 6 A modification controls the innate immune response to infection by  
1060 targeting type I interferons. *Nat. Immunol.* **20**, 173–182 (2019).
- 1061 42. Meyer, K. D. *et al.* Comprehensive analysis of mRNA methylation reveals enrichment in 3'  
1062 UTRs and near stop codons. *Cell* **149**, 1635–46 (2012).
- 1063 43. Li, X., Xiong, X. & Yi, C. Epitranscriptome sequencing technologies: decoding RNA  
1064 modifications. *Nat. Methods* **14**, 23–31 (2017).
- 1065 44. Carlile, T. M. *et al.* Pseudouridine profiling reveals regulated mRNA pseudouridylation in  
1066 yeast and human cells. *Nature* **515**, 143–146 (2014).
- 1067 45. Squires, J. E. *et al.* Widespread occurrence of 5-methylcytosine in human coding and non-  
1068 coding RNA. *Nucleic Acids Res.* **40**, 5023–5033 (2012).
- 1069 46. Li, X. *et al.* Base-Resolution Mapping Reveals Distinct m1A Methylome in Nuclear- and  
1070 Mitochondrial-Encoded Transcripts. *Mol. Cell* **68**, 993-1005.e9 (2017).

- 1071 47. Chen, K. *et al.* High-Resolution N6-Methyladenosine (m6A) Map Using Photo-Crosslinking-  
1072 Assisted m6A Sequencing. *Angew. Chem. Int. Ed.* **54**, 1587–1590 (2015).
- 1073 48. Ke, S. *et al.* A majority of m6A residues are in the last exons, allowing the potential for 3'  
1074 UTR regulation. *Genes Dev.* **29**, 2037–2053 (2015).
- 1075 49. Linder, B. *et al.* Single-nucleotide-resolution mapping of m6A and m6Am throughout the  
1076 transcriptome. *Nat. Methods* **12**, 767–772 (2015).
- 1077 50. Garcia-Campos, M. A. *et al.* Deciphering the “m6A Code” via Antibody-Independent  
1078 Quantitative Profiling. *Cell* **178**, 731-747.e16 (2019).
- 1079 51. Zeng, Y. *et al.* Refined RIP-seq protocol for epitranscriptome analysis with low input  
1080 materials. *PLOS Biol.* **16**, e2006092 (2018).
- 1081 52. Flusberg, B. A. *et al.* Direct detection of DNA methylation during single-molecule, real-time  
1082 sequencing. *Nat. Methods* **7**, 461–465 (2010).
- 1083 53. McIntyre, A. B. R. *et al.* Single-molecule sequencing detection of N 6-methyladenine in  
1084 microbial reference materials. *Nat. Commun.* **10**, 1–11 (2019).
- 1085 54. Liu, H. *et al.* Accurate detection of m 6 A RNA modifications in native RNA sequences. *Nat.*  
1086 *Commun.* **10**, 1–9 (2019).
- 1087 55. Lorenz, D. A., Sathe, S., Einstein, J. M. & Yeo, G. W. Direct RNA sequencing enables m6A  
1088 detection in endogenous transcript isoforms at base specific resolution. *RNA*  
1089 *rna.072785.119* (2019) doi:10.1261/rna.072785.119.
- 1090 56. Depledge, D. P. *et al.* Direct RNA sequencing on nanopore arrays redefines the  
1091 transcriptional complexity of a viral pathogen. *Nat. Commun.* **10**, 1–13 (2019).
- 1092 57. Reyes, E. D. *et al.* Identifying Host Factors Associated with DNA Replicated During Virus  
1093 Infection. *Mol Cell Proteomics* **16**, 2079–2097 (2017).
- 1094 58. Pombo, A., Ferreira, J., Bridge, E. & Carmo-Fonseca, M. Adenovirus replication and  
1095 transcription sites are spatially separated in the nucleus of infected cells. *EMBO J* **13**,  
1096 5075–85 (1994).

- 1097 59. Garalde, D. R. *et al.* Highly parallel direct RNA sequencing on an array of nanopores. *Nat.*  
1098 *Methods* **15**, 201–206 (2018).
- 1099 60. Parker, M. T. *et al.* Nanopore direct RNA sequencing maps an Arabidopsis N6  
1100 methyladenosine epitranscriptome. *bioRxiv* 706002 (2019) doi:10.1101/706002.
- 1101 61. Li, H. Minimap2: pairwise alignment for nucleotide sequences. *Bioinformatics* **34**, 3094–  
1102 3100 (2018).
- 1103 62. Fustin, J.-M. *et al.* RNA-Methylation-Dependent RNA Processing Controls the Speed of the  
1104 Circadian Clock. *Cell* **155**, 793–806 (2013).
- 1105 63. Russo, J., Heck, A. M., Wilusz, J. & Wilusz, C. J. Metabolic labeling and recovery of  
1106 nascent RNA to accurately quantify mRNA stability. *Methods San Diego Calif* **120**, 39–48  
1107 (2017).
- 1108 64. Kasowitz, S. D. *et al.* Nuclear m6A reader YTHDC1 regulates alternative polyadenylation  
1109 and splicing during mouse oocyte development. *PLOS Genet.* **14**, e1007412 (2018).
- 1110 65. Darnell, R. B., Ke, S. & Darnell, J. E. Pre-mRNA processing includes N6 methylation of  
1111 adenosine residues that are retained in mRNA exons and the fallacy of ‘RNA epigenetics’.  
1112 *RNA N. Y. N* **24**, 262–267 (2018).
- 1113 66. Louloui, A., Ntini, E., Conrad, T. & Ørom, U. A. V. Transient N-6-Methyladenosine  
1114 Transcriptome Sequencing Reveals a Regulatory Role of m6A in Splicing Efficiency. *Cell*  
1115 *Rep.* **23**, 3429–3437 (2018).
- 1116 67. Doma, M. K. & Parker, R. RNA Quality Control in Eukaryotes. *Cell* **131**, 660–668 (2007).
- 1117 68. Bresson, S. M., Hunter, O. V., Hunter, A. C. & Conrad, N. K. Canonical Poly(A) Polymerase  
1118 Activity Promotes the Decay of a Wide Variety of Mammalian Nuclear RNAs. *PLOS Genet.*  
1119 **11**, e1005610 (2015).
- 1120 69. Misra, A. & Green, M. R. From polyadenylation to splicing: Dual role for mRNA 3’ end  
1121 formation factors. *RNA Biol.* **13**, 259–264 (2015).

- 1122 70. Khandelia, P., Yap, K. & Makeyev, E. V. Streamlined platform for short hairpin RNA  
1123 interference and transgenesis in cultured mammalian cells. *Proc Natl Acad Sci U S A* **108**,  
1124 12799–804 (2011).
- 1125 71. Cong, L. *et al.* Multiplex genome engineering using CRISPR/Cas systems. *Science* **339**,  
1126 819–23 (2013).
- 1127 72. Wu, T. D., Reeder, J., Lawrence, M., Becker, G. & Brauer, M. J. GMAP and GSNAP for  
1128 Genomic Sequence Alignment: Enhancements to Speed, Accuracy, and Functionality.  
1129 *Methods Mol. Biol. Clifton NJ* **1418**, 283–334 (2016).
- 1130 73. Dobin, A. *et al.* STAR: ultrafast universal RNA-seq aligner. *Bioinforma. Oxf. Engl.* **29**, 15–  
1131 21 (2013).
- 1132 74. Zhang, Y. *et al.* Model-based Analysis of ChIP-Seq (MACS). *Genome Biol.* **9**, R137 (2008).
- 1133 75. Heinz, S. *et al.* Simple combinations of lineage-determining transcription factors prime cis-  
1134 regulatory elements required for macrophage and B cell identities. *Mol. Cell* **38**, 576–589  
1135 (2010).
- 1136 76. Ramírez, F. *et al.* deepTools2: a next generation web server for deep-sequencing data  
1137 analysis. *Nucleic Acids Res.* **44**, W160-165 (2016).
- 1138 77. Poling, B. C., Price, A. M., Luftig, M. A. & Cullen, B. R. The Epstein-Barr virus miR-BHRF1  
1139 microRNAs regulate viral gene expression in cis. *Virology* **512**, 113–123 (2017).
- 1140 78. Price, A. M., Messinger, J. E. & Luftig, M. A. c-Myc Represses Transcription of Epstein-Barr  
1141 Virus Latent Membrane Protein 1 Early after Primary B Cell Infection. *J. Virol.* **92**, (2018).
- 1142 79. Dolken, L. *et al.* High-resolution gene expression profiling for simultaneous kinetic  
1143 parameter analysis of RNA synthesis and decay. *RNA* **14**, 1959–72 (2008).
- 1144 80. Li, H. *et al.* The Sequence Alignment/Map format and SAMtools. *Bioinforma. Oxf. Engl.* **25**,  
1145 2078–2079 (2009).
- 1146 81. Quinlan, A. R. & Hall, I. M. BEDTools: a flexible suite of utilities for comparing genomic  
1147 features. *Bioinformatics* **26**, 841–842 (2010).

- 1148 82. Hahne, F. & Ivanek, R. Visualizing Genomic Data Using Gviz and Bioconductor. in  
1149 *Statistical Genomics: Methods and Protocols* (eds. Mathé, E. & Davis, S.) 335–351  
1150 (Springer, 2016). doi:10.1007/978-1-4939-3578-9\_16.
- 1151 83. Lawrence, M. *et al.* Software for Computing and Annotating Genomic Ranges. *PLOS*  
1152 *Comput. Biol.* **9**, e1003118 (2013).
- 1153
